# Supplementary material
Source: PubMed Central journal article supplement (PMC7331197)
Supplement: 13054_2020_3022_MOESM1_ESM.pdf [file 13054_2020_3022_MOESM1_ESM.pdf]

**Table S1.** Search strategy, update in Embase and Medline

|    | EMBASE#                                             | Results |    | MEDLINE#                                            | Results |
|----|-----------------------------------------------------|---------|----|-----------------------------------------------------|---------|
| 1  | coronavirus.ti,ab.                                  | 11196   | 1  | coronavirus.ti,ab.                                  | 10557   |
| 2  | corona virus.ti,ab.                                 | 299     | 2  | corona virus.ti,ab.                                 | 225     |
| 3  | coronavirinae.ti,ab.                                | 12      | 3  | coronavirinae.ti,ab.                                | 13      |
| 4  | coronaviridae.ti,ab.                                | 290     | 4  | coronaviridae.ti,ab.                                | 278     |
| 5  | betacoronavirus.ti,ab.                              | 184     | 5  | betacoronavirus.ti,ab.                              | 176     |
| 6  | covid19.ti,ab.                                      | 0       | 6  | covid19.ti,ab.                                      | 4       |
| 7  | covid 19.ti,ab.                                     | 543     | 7  | covid 19.mp.                                        | 1168    |
| 8  | nCoV.ti,ab.                                         | 285     | 8  | nCoV.ti,ab.                                         | 420     |
| 9  | CoV2.ti,ab.                                         | 18      | 9  | CoV2.ti,ab.                                         | 18      |
| 10 | sars cov 2.ti,ab.                                   | 206     | 10 | sars cov 2.ti,ab.                                   | 316     |
| 11 | "cov 2".ti,ab.                                      | 223     | 11 | "cov 2".ti,ab.                                      | 325     |
| 12 | 2019ncov.ti,ab.                                     | 1       | 12 | 2019ncov.ti,ab.                                     | 2       |
| 13 | "novel cov".ti,ab.                                  | 13      | 13 | "novel cov".ti,ab.                                  | 16      |
| 14 | "wuhan virus".ti,ab. 3c20                           | 2       | 14 | "wuhan virus".ti,ab.                                | 3       |
| 15 | (wuhan or Hubei or huanan).ti,ab.                   | 5590    | 15 | (wuhan or Hubei or huanan).ti,ab.                   | 4207    |
| 16 | ("severe acute respiratory" or pneumonia).ti,ab.    | 181945  | 16 | ("severe acute respiratory" or pneumonia).ti,ab.    | 117510  |
| 17 | exp severe acute respiratory syndrome/              | 8222    | 17 | exp severe acute respiratory syndrome/              | 4470    |
| 18 | exp pneumonia/                                      | 314802  | 18 | exp pneumonia/                                      | 90583   |
| 19 | or/16-18                                            | 351943  | 19 | or/16-18                                            | 159068  |
| 20 | outbreak.ti,ab.                                     | 66170   | 20 | outbreak.ti,ab.                                     | 55728   |
| 21 | and/15,19-20                                        | 96      | 21 | and/15,19-20                                        | 162     |
| 22 | exp Coronavirinae/                                  | 11286   | 22 | exp Coronavirinae/                                  | 12598   |
| 23 | coronavirus infections.sh.                          | 252     | 23 | coronavirus infections.sh.                          | 4493    |
| 24 | covid-19.sh.                                        | 3       | 24 | covid-19.sh.                                        | 0       |
| 25 | severe acute respiratory syndrome coronavirus 2.sh. | 19      | 25 | severe acute respiratory syndrome coronavirus 2.sh. | 0       |
| 26 | exp Betacoronavirus/                                | 6764    | 26 | exp Betacoronavirus/                                | 6432    |
| 27 | or/1-14,21-26                                       | 17252   | 27 | Severe Acute Respiratory Syndrome/                  | 4470    |
| 28 | limit 27 to yr="2020 -Current"                      | 1453    | 28 | exp Coronavirus/                                    | 11425   |

|  |  |  |    |                                                     |       |
|--|--|--|----|-----------------------------------------------------|-------|
|  |  |  | 29 | exp Coronavirus Infections/                         | 9723  |
|  |  |  | 30 | severe acute respiratory syndrome coronavirus 2.mp. | 306   |
|  |  |  | 31 | exp Betacoronavirus/                                | 6432  |
|  |  |  | 32 | or/1-14,21-31                                       | 19648 |
|  |  |  | 33 | limit 32 to ed=20191201-20200324                    | 534   |
|  |  |  | 34 | remove duplicates from 33                           | 521   |

#Searches run on March 24 2020 in Embase Classic and Embase and Ovid MEDLINE(R), retrieving citations from inception to March 23 2020, using the OVID SP platform.

| EMBASE§ |                                                  | Results | MEDLINE§ |                                                  | Results |
|---------|--------------------------------------------------|---------|----------|--------------------------------------------------|---------|
| 1       | coronavirus.ti,ab.                               | 12384   | 1        | coronavirus.ti,ab.                               | 12222   |
| 2       | corona virus.ti,ab.                              | 361     | 2        | corona virus.ti,ab.                              | 304     |
| 3       | coronavirinae.ti,ab.                             | 12      | 3        | coronavirinae.ti,ab.                             | 13      |
| 4       | coronaviridae.ti,ab.                             | 296     | 4        | coronaviridae.ti,ab.                             | 295     |
| 5       | betacoronavirus.ti,ab.                           | 195     | 5        | betacoronavirus.ti,ab.                           | 198     |
| 6       | covid19.ti,ab.                                   | 27      | 6        | covid19.ti,ab.                                   | 42      |
| 7       | covid 19.ti,ab.                                  | 2751    | 7        | covid 19.mp.                                     | 4679    |
| 8       | nCoV.ti,ab.                                      | 393     | 8        | nCoV.ti,ab.                                      | 526     |
| 9       | CoV2.ti,ab.                                      | 40      | 9        | CoV2.ti,ab.                                      | 47      |
| 10      | sars cov 2.ti,ab.                                | 790     | 10       | sars cov 2.ti,ab.                                | 1163    |
| 11      | "cov 2".ti,ab.                                   | 811     | 11       | "cov 2".ti,ab.                                   | 1179    |
| 12      | 2019ncov.ti,ab.                                  | 2       | 12       | 2019ncov.ti,ab.                                  | 4       |
| 13      | "novel cov".ti,ab.                               | 13      | 13       | "novel cov".ti,ab.                               | 17      |
| 14      | "wuhan virus".ti,ab.                             | 3       | 14       | "wuhan virus".ti,ab.                             | 4       |
| 15      | (wuhan or Hubei or huanan).ti,ab.                | 5975    | 15       | (wuhan or Hubei or huanan).ti,ab.                | 4632    |
| 16      | ("severe acute respiratory" or pneumonia).ti,ab. | 182983  | 16       | ("severe acute respiratory" or pneumonia).ti,ab. | 118629  |
| 17      | exp severe acute respiratory syndrome/           | 8361    | 17       | exp severe acute respiratory syndrome/           | 4537    |
| 18      | exp pneumonia/                                   | 316539  | 18       | exp pneumonia/                                   | 91640   |
| 19      | or/16-18                                         | 354060  | 19       | or/16-18                                         | 160932  |
| 20      | outbreak.ti,ab.                                  | 66837   | 20       | outbreak.ti,ab.                                  | 56628   |
| 21      | and/15,19-20                                     | 189     | 21       | and/15,19-20                                     | 268     |
| 22      | exp Coronavirinae/                               | 12757   | 22       | exp Coronavirinae/                               | 13417   |

|    |                                                                                                                    |         |    |                                                     |         |
|----|--------------------------------------------------------------------------------------------------------------------|---------|----|-----------------------------------------------------|---------|
| 23 | coronavirus infections.sh.                                                                                         | 252     | 23 | coronavirus infections.sh.                          | 5392    |
| 24 | covid-19.sh.                                                                                                       | 110     | 24 | covid-19.sh.                                        | 0       |
| 25 | severe acute respiratory syndrome coronavirus 2.sh.                                                                | 392     | 25 | severe acute respiratory syndrome coronavirus 2.sh. | 0       |
| 26 | exp Betacoronavirus/                                                                                               | 7733    | 26 | exp Betacoronavirus/                                | 7224    |
| 27 | or/1-14,21-26                                                                                                      | 20069   | 27 | Severe Acute Respiratory Syndrome/                  | 4537    |
| 28 | limit 27 to yr="2020 -Current"                                                                                     | 4247    | 28 | exp Coronavirus/                                    | 12243   |
| 29 | letter.pt.                                                                                                         | 1109811 | 29 | exp Coronavirus Infections/                         | 10626   |
| 30 | editorial.pt.                                                                                                      | 649149  | 30 | severe acute respiratory syndrome coronavirus 2.mp. | 1340    |
| 31 | conference abstract.pt.                                                                                            | 3749649 | 31 | exp Betacoronavirus/                                | 7224    |
| 32 | note.pt.                                                                                                           | 792782  | 32 | or/1-14,21-31                                       | 23707   |
| 33 | or/29-32                                                                                                           | 6301391 | 33 | limit 32 to yr="2020 -Current"                      | 5864    |
| 34 | (exp animal/ or nonhuman/) not exp human/                                                                          | 7144518 | 34 | editorial.pt.                                       | 524415  |
| 35 | Hospitalization/                                                                                                   | 374011  | 35 | letter.pt.                                          | 1071161 |
| 36 | exp Mortality/                                                                                                     | 1121888 | 36 | comment.pt.                                         | 841461  |
| 37 | Critical Care/                                                                                                     | 97128   | 37 | retracted-publication.pt.                           | 7482    |
| 38 | exp Intensive Care Units/                                                                                          | 189013  | 38 | clinical-conference.pt.                             | 7330    |
| 39 | exp Acute Kidney Injury/                                                                                           | 87211   | 39 | or/34-38                                            | 1844087 |
| 40 | exp Disseminated Intravascular Coagulation/                                                                        | 25191   | 40 | exp animals/ not humans.sh.                         | 4691007 |
| 41 | Shock, Cardiogenic/                                                                                                | 14769   | 41 | Hospitalization/                                    | 105236  |
| 42 | Hemorrhage/                                                                                                        | 107048  | 42 | exp Mortality/                                      | 376717  |
| 43 | Respiratory Distress Syndrome, Adult/                                                                              | 17790   | 43 | Critical Care/                                      | 51398   |
| 44 | acute respiratory distress syndrom*.mp.                                                                            | 19783   | 44 | exp Intensive Care Units/                           | 82682   |
| 45 | hospitali#ation*.ti,ab.                                                                                            | 267487  | 45 | exp Acute Kidney Injury/                            | 45549   |
| 46 | ("intensive care unit\$1" or icu\$1).ti,ab.                                                                        | 223717  | 46 | exp Disseminated Intravascular Coagulation/         | 10944   |
| 47 | (acute adj5 kidney adj5 injur*).ti,ab.                                                                             | 35673   | 47 | Shock, Cardiogenic/                                 | 8370    |
| 48 | (acute adj5 cardiac adj5 injur*).ti,ab.                                                                            | 1995    | 48 | Hemorrhage/                                         | 72178   |
| 49 | (dvt\$1 or vte\$1 or "deep venous thromb*" or "pulmonary embol*" or "venous thromboembol*" or coagulopath*).ti,ab. | 130340  | 49 | Respiratory Distress Syndrome, Adult/               | 19095   |
| 50 | Disseminated Intravascular Coagulation*.ti,ab.                                                                     | 13142   | 50 | acute respiratory distress syndrom*.mp.             | 13082   |
| 51 | major bleeding\$1.ti,ab.                                                                                           | 18672   | 51 | hospitali#ation*.ti,ab.                             | 154202  |
| 52 | (clinical* adj5 relevant adj5 bleeding\$1).ti,ab.                                                                  | 1538    | 52 | ("intensive care unit\$1" or icu\$1).ti,ab.         | 133934  |

|           |                                                                                            |         |    |                                                                                                                    |         |
|-----------|--------------------------------------------------------------------------------------------|---------|----|--------------------------------------------------------------------------------------------------------------------|---------|
| <b>53</b> | (clinical* adj5 (outcome* or characteristic* or finding* or feature* or progression*)).mp. | 1511572 | 53 | (acute adj5 kidney adj5 injur*).ti,ab.                                                                             | 21470   |
| <b>54</b> | critical care.ti,ab.                                                                       | 45356   | 54 | (acute adj5 cardiac adj5 injur*).ti,ab.                                                                            | 1303    |
| <b>55</b> | shock.ti,ab.                                                                               | 247235  | 55 | (dvt\$1 or vte\$1 or "deep venous thromb*" or "pulmonary embol*" or "venous thromboembol*" or coagulopath*).ti,ab. | 79037   |
| <b>56</b> | case fatalit*.ti,ab.                                                                       | 12004   | 56 | Disseminated Intravascular Coagulation*.ti,ab.                                                                     | 9726    |
| <b>57</b> | "*Characteristics".kw.                                                                     | 16885   | 57 | major bleeding\$1.ti,ab.                                                                                           | 9617    |
| <b>58</b> | (death or died or mortality).ti,ab.                                                        | 2188381 | 58 | (clinical* adj5 relevant adj5 bleeding\$1).ti,ab.                                                                  | 750     |
| <b>59</b> | artificial ventilation/                                                                    | 137911  | 59 | (clinical* adj5 (outcome* or characteristic* or finding* or feature* or progression*)).mp.                         | 599849  |
| <b>60</b> | (invasive adj5 ventilation).mp.                                                            | 12970   | 60 | critical care.ti,ab.                                                                                               | 26678   |
| <b>61</b> | exp hospital discharge/                                                                    | 122495  | 61 | shock.ti,ab.                                                                                                       | 174125  |
| <b>62</b> | (hospital adj5 discharge*).mp.                                                             | 165220  | 62 | case fatalit*.ti,ab.                                                                                               | 9427    |
| <b>63</b> | or/35-62                                                                                   | 4783482 | 63 | "*Characteristics".kw.                                                                                             | 524     |
| <b>64</b> | 27 not 33                                                                                  | 16479   | 64 | (death or died or mortality).ti,ab.                                                                                | 1442393 |
| <b>65</b> | 64 not 34                                                                                  | 8629    | 65 | Respiration, Artificial/                                                                                           | 48046   |
| <b>66</b> | and/63,65                                                                                  | 2368    | 66 | (invasive adj5 ventilation).mp.                                                                                    | 5926    |
| <b>67</b> | limit 66 to yr="2020 -Current"                                                             | 708     | 67 | intubation\$1.mp.                                                                                                  | 76264   |
| <b>68</b> | remove duplicates from 67                                                                  | 699     | 68 | or/41-67                                                                                                           | 2771114 |
| <b>69</b> | limit 68 to english language                                                               | 640     | 69 | 32 not 39                                                                                                          | 21003   |
|           |                                                                                            |         | 70 | 69 not 40                                                                                                          | 13531   |
|           |                                                                                            |         | 71 | and/68,70                                                                                                          | 2768    |
|           |                                                                                            |         | 72 | limit 71 to yr="2020 -Current"                                                                                     | 948     |
|           |                                                                                            |         | 73 | remove duplicates from 72                                                                                          | 910     |
|           |                                                                                            |         | 74 | limit 73 to english language                                                                                       | 805     |

§Searches run on April 20 2020 in Embase Classic+Embase and Ovid MEDLINE(R) ALL, using the OVID SP platform. We applied three filters to reduces the numbers needed to screen: a filter excluding irrelevant publication types, a filter excluding animal studies and a filter to retrieve studies focusing on clinical outcomes. This search strategy was validated using the 21 published reports identified in the initial search as reference set. Both searches in Embase and MEDLINE identified each of the 21 citations from the reference set.

**Table S2.** Search strategy in Pubmed

| <b>Search</b> | <b>Pubmed Query#</b>                                                                                                                                                                                                                                                                                                                                                                                                                                                                                                                                                                                                                                                                                                                                                                                                                                                                                                                                                                                                                                                                                                                                                                                           | <b>Results</b>   |
|---------------|----------------------------------------------------------------------------------------------------------------------------------------------------------------------------------------------------------------------------------------------------------------------------------------------------------------------------------------------------------------------------------------------------------------------------------------------------------------------------------------------------------------------------------------------------------------------------------------------------------------------------------------------------------------------------------------------------------------------------------------------------------------------------------------------------------------------------------------------------------------------------------------------------------------------------------------------------------------------------------------------------------------------------------------------------------------------------------------------------------------------------------------------------------------------------------------------------------------|------------------|
| #4            | (#1 not #2) and #3                                                                                                                                                                                                                                                                                                                                                                                                                                                                                                                                                                                                                                                                                                                                                                                                                                                                                                                                                                                                                                                                                                                                                                                             | 1121 - final set |
| #3            | Search ((((((((((((((((((((((((((hospitisation*[Title/Abstract]) OR hospitalization*[Title/Abstract]) OR acute respiratory distress syndrom*) OR intensive care unit*[Title/Abstract]) OR icus[Title/Abstract]) OR icu[Title/Abstract]) OR (acute and kidney and injur*[Title/Abstract])) OR (acute and cardiac and injur*[Title/Abstract])) OR dvt[Title/Abstract]) OR dvts[Title/Abstract]) OR vte[Title/Abstract]) OR vtes[Title/Abstract]) OR pulmonary embol*[Title/Abstract]) OR deep venous thromb*[Title/Abstract]) OR venous thromboembol*[Title/Abstract]) OR coagulopath*[Title/Abstract]) OR Disseminated Intravascular Coagulation*[Title/Abstract]) OR major bleeding*[Title/Abstract]) OR (clinical* and relevant and bleeding*[Title/Abstract])) OR (((outcome* or characteristic* or finding* or feature* or progression*) and clinical))) OR critical care[Title/Abstract]) OR shock[Title/Abstract]) OR case fatal*[Title/Abstract]) OR death[Title/Abstract]) OR died[Title/Abstract]) OR mortality[Title/Abstract]) OR (invasive and ventilation[Title/Abstract])) OR intubation[Title/Abstract]) OR mechanical ventilation[Title/Abstract]) OR (hospital and discharge*[Title/Abstract]) | 3607732          |
| #2            | Search (((("letter"[Publication Type]) OR "comment"[Publication Type]) OR "editorial"[Publication Type]) OR (("retraction of publication"[Publication Type] OR retracted publication[Publication Type])) OR "clinical conference"[Publication Type]) OR "congress"[Publication Type]                                                                                                                                                                                                                                                                                                                                                                                                                                                                                                                                                                                                                                                                                                                                                                                                                                                                                                                           | 1928332          |
| #1            | Search (((coronavirus OR “corona virus” OR coronavirinae OR coronaviridae OR betacoronavirus OR covid19 OR “covid 19” OR nCoV OR “CoV 2” OR CoV2 OR sarscov2 OR 2019nCoV OR “novel CoV” OR “wuhan virus”) OR ((wuhan OR hubei OR huanan) AND (“severe acute respiratory” OR pneumonia) AND (outbreak)) OR “Coronavirus”[Mesh] OR “Coronavirus Infections”[Mesh] OR “COVID-19” [Supplementary Concept] OR “severe acute respiratory syndrome coronavirus 2” [Supplementary Concept] OR “Betacoronavirus”[Mesh]) NOT medline [sb])                                                                                                                                                                                                                                                                                                                                                                                                                                                                                                                                                                                                                                                                               | 5768             |

#Searches run on April 20 2020, in pubmed.gov, advanced search builder. Search is set to capture citations not or not yet indexed in OVID MEDLINE.

**Table S3.** Characteristics of peer-reviewed studies

| <b>Study</b>     | <b>Study design</b> | <b>Centers</b> | <b>Location</b>           | <b>Setting</b> | <b>Inclusion, start date</b> | <b>Inclusion, end date</b> |
|------------------|---------------------|----------------|---------------------------|----------------|------------------------------|----------------------------|
| Cao B(1)         | Open-label RCT      | Single center  | Wuhan, China              | Hospitalized   | 18-Jan-20                    | 3-Feb-20                   |
| Cao J(2)         | Retrospective       | Single center  | Wuhan, China              | Hospitalized   | 03-Jan-20                    | 1-Feb-20                   |
| Chen J(3)        | Retrospective       | Single center  | Shanghai, China           | Hospitalized   | 20-Jan-20                    | 6-Feb-20                   |
| Chen N(4)        | Retrospective       | Single center  | Wuhan, China              | Hospitalized   | 1-Jan-20                     | 25-Jan-20                  |
| Chen T(5)        | Retrospective       | Single center  | Wuhan, China              | Hospitalized   | 01-Jan-20                    | 10-Feb-20                  |
| Cui S(6)         | Retrospective       | Single center  | China                     | Hospitalized   | 30-Jan-20                    | 22-Feb-20                  |
| Fan Z(7)         | Retrospective       | Single center  | Shanghai, China           | Hospitalized   | 20-Jan-20                    | 29-Feb-20                  |
| Feng Y(8)        | Retrospective       | Multicenter    | Wuhan, China              | Hospitalized   | 01-Jan-20                    | 15-Feb-20                  |
| Gao L(9)         | Retrospective       | Single center  | Wuhan, China              | Hospitalized   | -                            | -                          |
| Grasselli G(10)  | Retrospective       | Multicenter    | Lombardy, Italy           | Hospitalized   | 20-Feb-20                    | 18-Mar-20                  |
| Grein J(11)      | Retrospective       | Multicenter    | US, Canada, Europe, Japan | Hospitalized   | 25-Jan-20                    | 7-Mar-20                   |
| Guan Wei-jie(12) | Retrospective       | Multicenter    | China                     | Hospitalized   | 11-Dec-19                    | 31-Jan-20                  |
| Guan Wei-jie(13) | Retrospective       | Multicenter    | China                     | Mixed          | 11-Dec-19                    | 29-Jan-20                  |
| Guo T(14)        | Retrospective       | Single center  | Wuhan, China              | Hospitalized   | 23-Jan-20                    | 23-Feb-20                  |
| Han H(15)        | Retrospective       | Single center  | Wuhan, China              | Hospitalized   | 01-Jan-20                    | 18-Feb-20                  |
| Jin X(16)        | Retrospective       | Multicenter    | Zhejiang province         | Hospitalized   | 17-Jan-20                    | 8-Feb-20                   |
| Klok FA(17)      | Retrospective       | Multicenter    | Netherlands               | Hospitalized   | 7-Mar-20                     | 5-Apr-20                   |
| Li R(18)         | Retrospective       | Single center  | China                     | Hospitalized   | 20-Jan-20                    | 14-Feb-20                  |
| Li X(19)         | Ambispective        | Single center  | Wuhan, China              | Hospitalized   | 26-Jan-20                    | 5-Feb-20                   |
| Lian J(20)       | Retrospective       | not specified  | Zhejiang Province, China  | Hospitalized   | 17-Jan-20                    | 12-Feb-20                  |
| Liu Kay(21)      | Retrospective       | Single center  | Hainan, China             | Hospitalized   | 15-Jan-20                    | 18-Feb-20                  |
| Liu Kui(22)      | Retrospective       | Multicenter    | Hubei Province, China     | Hospitalized   | 30-Dec-19                    | 24-Jan-20                  |

|                 |               |               |                          |              |               |           |
|-----------------|---------------|---------------|--------------------------|--------------|---------------|-----------|
| Liu W(23)       | Retrospective | Multicenter   | Wuhan, China             | Hospitalized | 30-Dec-19     | 15-Jan-20 |
| Qian G(24)      | Retrospective | Multicenter   | Zhejiang Province, China | Hospitalized | 20-Jan-20     | 11-Feb-20 |
| Shi H(25)       | Retrospective | Multicenter   | Wuhan, China             | Hospitalized | 20-Dec-19     | 23-Jan-20 |
| Shi S(26)       | Retrospective | Single center | Wuhan, China             | Hospitalized | 20-Jan-20     | 10-Feb-20 |
| Tang Ning(27)   | Retrospective | Single center | Tongji, China            | Hospitalized | 1-Jan-20      | 13-Feb-20 |
| Tang Ning(28)   | Retrospective | Single center | Whuan, China             | Hospitalized | 1-Jan-20      | 3-Feb-20  |
| Tian S(29)      | Retrospective | Multicenter   | Beijing, China           | Hospitalized | 20-Jan-20     | 10-Feb-20 |
| Wang D(30)      | Retrospective | Single center | Wuhan, China             | Hospitalized | 1-Jan-20      | 28-Jan-20 |
| Wang Lang(31)   | Retrospective | Single center | Wuhan, China             | Hospitalized | 1-Jan-20      | 6-Feb-20  |
| Wang Luwen(32)  | Retrospective | Single center | Wuhan, China             | Hospitalized | 14-Jan-20     | 13-Feb-20 |
| Wang Yang(33)   | Retrospective | Single center | Tongji, China            | Hospitalized | 25-Jan-20     | 25-Feb-20 |
| Wang Yunhui(34) | Retrospective | Single center | Wuhan, China             | Hospitalized | 16-Jan-20     | 17-Feb-20 |
| Wang Z(35)      | Retrospective | Single center | Wuhan, China             | Hospitalized | 16-Jan-20     | 29-Jan-20 |
| Wu C(36)        | Retrospective | Single center | Wuhan, China             | Hospitalized | 25-Dec-19     | 26-Jan-20 |
| Wu J(37)        | Retrospective | Multicenter   | Jiangsu Province, China  | Hospitalized | 22-Jan-20     | 14-Feb-20 |
| Xu XW(38)       | Retrospective | Multicenter   | Zhejiang Province, China | Hospitalized | 10-Jan-20     | 26-Jan-20 |
| Yang W(39)      | Retrospective | Multicenter   | Wenzhou, China           | Hospitalized | 17-Jan-20     | 10-Feb-20 |
| Yang Xiaobo(40) | Retrospective | Single center | Wuhuan, China            | Hospitalized | 24-Dec-19     | 26-Jan-20 |
| Yang Xiaobo(41) | Retrospective | Single center | Wuhan, China             | Hospitalized | late December | 25-Feb-20 |
| Zhang J(42)     | Retrospective | Single center | Wuhan, China             | Hospitalized | 11-Jan-20     | 6-Feb-20  |
| Zhang L(43)     | Retrospective | Single center | Wuhan, China             | Hospitalized | 12-Jan-20     | 15-Mar-20 |
| Zhou F(44)      | Retrospective | Multicenter   | Wuhan, China             | Hospitalized | 29-Dec-19     | 31-Jan-20 |

**Table S4.** MINORS quality assessment for peer-reviewed studies

| Study            | Clearly stated aim | Inclusion of consecutive patients | Prospective collection of data | Endpoints appropriate to the aim of the study | Unbiased assessment of the study endpoint | Follow-up period appropriate to the aim of the study | Loss to follow-up less than 5% | Prospective calculation of the study size |
|------------------|--------------------|-----------------------------------|--------------------------------|-----------------------------------------------|-------------------------------------------|------------------------------------------------------|--------------------------------|-------------------------------------------|
| Cao J(2)         | Adequate           | Unclear                           | Inadequate                     | Death: Adequate<br>ARDS: Inadequate           | ARDS: Unclear                             | Inadequate*                                          | Adequate                       | Unclear                                   |
| Chen J(3)        | Adequate           | Unclear                           | Inadequate                     | Death: Adequate<br>ARDS: Inadequate           | ARDS: Unclear                             | Inadequate                                           | Adequate                       | Unclear                                   |
| Chen N(4)        | Adequate           | Adequate                          | Inadequate                     | Death: Adequate<br>ARDS: Inadequate           | ARDS: Unclear                             | Inadequate                                           | Adequate                       | Unclear                                   |
| Chen T(5)        | Adequate           | Unclear                           | Inadequate                     | Death: Adequate<br>ARDS: Adequate             | ARDS: Unclear                             | Inadequate                                           | Adequate                       | Unclear                                   |
| Cui S(6)         | Adequate           | Unclear                           | Inadequate                     | Death: Adequate                               | -                                         | Inadequate                                           | Adequate                       | Unclear                                   |
| Fan Z(7)         | Adequate           | Adequate                          | Inadequate                     | Death: Adequate                               | -                                         | Inadequate*                                          | Unclear                        | Unclear                                   |
| Feng Y(8)        | Adequate           | Unclear                           | Inadequate                     | Death: Adequate                               | -                                         | Inadequate*                                          | Adequate                       | Unclear                                   |
| Gao L(9)         | Adequate           | Inadequate                        | Inadequate                     | Death: Adequate                               | -                                         | Adequate                                             | Adequate                       | Unclear                                   |
| Grasselli G(10)  | Adequate           | Adequate                          | Inadequate                     | Death: Adequate                               | -                                         | Inadequate                                           | Adequate                       | Unclear                                   |
| Grein J(11)      | Adequate           | Unclear                           | Inadequate                     | Death: Adequate<br>ARDS: Inadequate           | -                                         | Adequate                                             | Adequate                       | Inadequate                                |
| Guan Wei-jie(12) | Adequate           | Inadequate                        | Inadequate                     | Death: Adequate<br>ARDS: Unclear              | ARDS: Unclear                             | Inadequate                                           | Adequate                       | Unclear                                   |
| Guan Wei-jie(13) | Adequate           | Inadequate                        | Inadequate                     | Death: Adequate<br>ARDS: Adequate             | ARDS: Unclear                             | Inadequate                                           | Adequate                       | Unclear                                   |
| Guo T(14)        | Adequate           | Inadequate                        | Inadequate                     | Death: Adequate                               | -                                         | Adequate                                             | Adequate                       | Unclear                                   |
| Han H(15)        | Adequate           | Unclear                           | Inadequate                     | Death: Adequate                               | -                                         | Inadequate*                                          | Adequate                       | Unclear                                   |
| Jin X(16)        | Adequate           | Unclear                           | Inadequate                     | Death: Adequate<br>ARDS: Adequate             | ARDS: Unclear                             | Inadequate                                           | Adequate                       | Unclear                                   |
| Klok FA(17)      | Adequate           | Unclear                           | Inadequate                     | Death: Adequate                               | -                                         | Inadequate                                           | Adequate                       | Unclear                                   |
| Li R(18)         | Adequate           | Unclear                           | Inadequate                     | Death: Adequate                               | -                                         | Inadequate*                                          | Adequate                       | Unclear                                   |
| Li X(19)         | Adequate           | Adequate                          | Inadequate                     | Death: Adequate<br>ARDS: Inadequate           | ARDS: Unclear                             | Adequate                                             | Adequate                       | Inadequate                                |
| Lian J(20)       | Adequate           | Unclear                           | Inadequate                     | Death: Adequate<br>ARDS: Inadequate           | ARDS: Unclear                             | Inadequate                                           | Unclear                        | Unclear                                   |
| Liu Kay(21)      | Adequate           | Unclear                           | Inadequate                     | Death: Adequate<br>ARDS: Inadequate           | ARDS: Unclear                             | Unclear                                              | Adequate                       | Unclear                                   |



|                    |          |            |            |                                     |               |             |          |            |
|--------------------|----------|------------|------------|-------------------------------------|---------------|-------------|----------|------------|
| Liu Kui(22)        | Adequate | Unclear    | Inadequate | Death: Adequate                     | -             | Inadequate  | Adequate | Unclear    |
| Liu W(23)          | Adequate | Unclear    | Inadequate | Death: Adequate<br>ARDS: Adequate   | ARDS: Unclear | Inadequate* | Unclear  | Unclear    |
| Qian G(24)         | Adequate | Unclear    | Inadequate | Death: Adequate<br>ARDS: Inadequate | ARDS: Unclear | Inadequate  | Unclear  | Unclear    |
| Shi H(25)          | Adequate | Inadequate | Inadequate | Death: Adequate<br>ARDS: Inadequate | ARDS: Unclear | Inadequate* | Adequate | Unclear    |
| Shi S(26)          | Adequate | Adequate   | Inadequate | Death: Adequate<br>ARDS: Adequate   | ARDS: Unclear | Inadequate  | Adequate | Unclear    |
| Tang Ning(27)      | Adequate | Adequate   | Inadequate | Death: Adequate                     | -             | Inadequate* | Adequate | Unclear    |
| Tang Ning(28)      | Adequate | Unclear    | Inadequate | Death: Adequate                     | -             | Inadequate  | Unclear  | Unclear    |
| Tian S(29)         | Adequate | Unclear    | Inadequate | Death: Adequate                     | -             | Inadequate  | Unclear  | Unclear    |
| Wang D(30)         | Adequate | Adequate   | Inadequate | Death: Adequate<br>ARDS: Adequate   | ARDS: Unclear | Inadequate  | Adequate | Unclear    |
| Wang Lang(31)      | Adequate | Adequate   | Inadequate | Death: Adequate<br>ARDS: Adequate   | ARDS: Unclear | Inadequate* | Adequate | Unclear    |
| Wang<br>Luwen(32)  | Adequate | Unclear    | Inadequate | Death: Adequate<br>ARDS: Inadequate | ARDS: Unclear | Inadequate  | Adequate | Unclear    |
| Wang Yang(33)      | Adequate | Unclear    | Inadequate | Death: Adequate<br>ARDS: Adequate   | ARDS: Unclear | Adequate    | Adequate | Unclear    |
| Wang<br>Yuhui(34)  | Adequate | Unclear    | Adequate   | Death: Adequate                     | -             | Inadequate  | Adequate | Unclear    |
| Wang Z(35)         | Adequate | Adequate   | Inadequate | Death: Adequate                     | -             | Inadequate  | Adequate | Unclear    |
| Wu C(36)           | Adequate | Unclear    | Inadequate | Death: Adequate<br>ARDS: Adequate   | ARDS: Unclear | Inadequate* | Adequate | Unclear    |
| Wu J(37)           | Adequate | Adequate   | Inadequate | Death: Adequate<br>ARDS: Inadequate | ARDS: Unclear | Inadequate  | Unclear  | Unclear    |
| Xu XW(38)          | Adequate | Unclear    | Inadequate | Death: Adequate<br>ARDS: Inadequate | ARDS: Unclear | Inadequate  | Unclear  | Unclear    |
| Yang W(39)         | Adequate | Adequate   | Inadequate | Death: Adequate<br>ARDS: Inadequate | ARDS: Unclear | Inadequate  | Adequate | Unclear    |
| Yang<br>Xiaobo(40) | Adequate | Unclear    | Inadequate | Death: Adequate<br>ARDS: Adequate   | ARDS: Unclear | Inadequate* | Adequate | Inadequate |
| Yang<br>Xiaobo(41) | Adequate | Adequate   | Inadequate | Death: Adequate                     | -             | Adequate    | Adequate | Unclear    |
| Zhang J(42)        | Adequate | Adequate   | Inadequate | Death: Adequate<br>ARDS: Adequate   | ARDS: Unclear | Unclear     | Adequate | Unclear    |

|             |          |          |            |                                   |               |          |          |         |
|-------------|----------|----------|------------|-----------------------------------|---------------|----------|----------|---------|
| Zhang L(43) | Adequate | Adequate | Inadequate | Death: Adequate<br>ARDS: Adequate | ARDS: Unclear | Unclear  | Adequate | Unclear |
| Zhou F(44)  | Adequate | Adequate | Inadequate | Death: Adequate<br>ARDS: Adequate | ARDS: Unclear | Adequate | Adequate | Unclear |

\*Patients followed-up for at least 2 weeks, until discharge or death

**Table S5.** Characteristics of not peer-reviewed studies

| Study                  | Study design  | Centers       | Location                        | Setting      | Inclusion, start date | Inclusion, end date |
|------------------------|---------------|---------------|---------------------------------|--------------|-----------------------|---------------------|
| Benelli G(45)          | Prospective   | Single center | Crema, Italy                    | Hospitalized | 21-Feb-20             | 19-Mar-20           |
| Chen C(46)             | RCT           | Multicenter   | Wuhan and Hubei Province, China | Hospitalized | 20-Feb-20             | 12-Mar-20           |
| Chen Xiaoping(47)      | Retrospective | Single center | Wuhan, China                    | Hospitalized | 5-Jan-20              | 7-Mar-20            |
| Chen Xu(48)            | Retrospective | Multicenter   | Hunan Province, China           | Hospitalized | 23-Jan-20             | 14-Feb-20           |
| Cheng Y(49)            | Retrospective | Single center | Wuhan, China                    | Hospitalized | 28-Jan-20             | 11-Feb-20           |
| Cummings MJ(50)        | Prospective   | Multicenter   | New York, USA                   | Hospitalized | 2-Mar-20              | 1-Apr-20            |
| Fan L(51)              | Retrospective | Single center | Shenyang, China                 | Hospitalized | 20-Jan-20             | 15-Mar-20           |
| Feng Z(52)             | Retrospective | Multicenter   | South China, China              | Hospitalized | 17-Jan-20             | 28-Feb-20           |
| Fu L(53)               | Retrospective | Single center | Wuhan, China                    | Hospitalized | 1-Jan-20              | 30-Jan-20           |
| Giorgi Rossi P(54)     | Prospective   | Multicenter   | Reggio Emilia, Italy            | Mixed        | 27-Feb-20             | 2-Apr-20            |
| Hu L(55)               | Retrospective | Single center | Wuhan, China                    | Hospitalized | 8-Jan-02              | 20-Feb-20           |
| Jiang X(56)            | Retrospective | Single center | Wuxi, China                     | Hospitalized | 23-Jan-20             | 16-Feb-20           |
| Joharatnam-Hogan N(57) | Retrospective | Multicenter   | London, England                 | Hospitalized | 12-Mar-20             | 7-Apr-20            |
| Liu J(58)              | Retrospective | Single center | Wuhan, China                    | Hospitalized | 16-Jan-20             | 15-Feb-20           |
| Liu Qibin(59)          | Retrospective | Multicenter   | Tongji, Cjina                   | Hospitalized | 13-Dec-19             | 21-mar-20           |
| Liu Qibin(60)          | Retrospective | Single center | Tongji, China                   | Hospitalized | 31-Jan-20             | 8-Mar-20            |
| Liu Yanli(61)          | Retrospective | Single center | Wuhan, China                    | Hospitalized | 2-Jan-20              | 1-Feb-20            |
| Liu Youbin(62)         | Retrospective | Single center | Guangzhou, China                | Hospitalized | 10-Jan-20             | 24-Feb-20           |
| Lu X(63)               | Retrospective | Single center | Tongji, China                   | Hospitalized | 25-Jan-20             | 25-Feb-20           |
| Magagnoli J(64)        | Retrospective | Multicenter   | South Carolina, USA             | Hospitalized | 9-mar-20              | 11-Apr-20           |
| Qi D(65)               | Retrospective | Multicenter   | Chongqing, China                | Hospitalized | 19-Jan-20             | 16-Feb-20           |
| Qiu C(66)              | Retrospective | Multicenter   | Hunan Province, China           | Hospitalized | 22-Jan-20             | 12-Feb-20           |
| Rubin SJ(67)           | Retrospective | Single center | California, USA                 | Mixed        | 16-mar-20             | -                   |
| Wang Z(68)             | Retrospective | Multicenter   | Sichuan Province, China         | Hospitalized | 16-Jan-20             | 3-Apr-20            |
| Wen Y(69)              | Retrospective | -             | Shenzhen, China                 | Hospitalized | 1-Jan-20              | 28-Feb-20           |
| Wu C(70)               | Retrospective | Single center | Wuhan, China                    | Hospitalized | 25-Oct-20             | 27-Jan-20           |
| Wu Y(71)               | Retrospective | Single center | Wuhan, China                    | Hospitalized | -                     | 2-Feb-20            |
| Xiao G(72)             | Retrospective | Single center | Wuhan, China                    | Hospitalized | 5-Jan-2020            | 8-Mar-20            |
| Xu H(73)               | Retrospective | -             | China                           | Hospitalized | 2-Jan-20              | 14-Feb-20           |

|             |               |               |                         |              |           |           |
|-------------|---------------|---------------|-------------------------|--------------|-----------|-----------|
| Xu S(74)    | Retrospective | Multicenter   | Wuhan and Fuyang, China | Hospitalized | -         | -         |
| Xu Y(75)    | Retrospective | Multicenter   | China                   | Hospitalized | 7-Feb-20  | 28-Feb-20 |
| Yan S(76)   | Retrospective | Multicenter   | Hainan Province, China  | Hospitalized | 22-Jan-20 | 13-Mar-20 |
| Zeng L(77)  | Retrospective | Single center | Shenzhen, China         | Hospitalized | 1-Jan-20  | 29-Feb-20 |
| Zhang G(78) | Retrospective | Single center | Wuhan, China            | Hospitalized | 2-Jan-20  | 10-Feb-20 |
| Zhao W(79)  | Retrospective | Single center | Beijing, China          | Hospitalized | 21-Jan-20 | 8-Feb-20  |

**Table S6.** MINORS quality assessment for not peer-reviewed studies

| Study                  | Clearly stated aim | Inclusion of consecutive patients | Prospective collection of data | Endpoints appropriate to the aim of the study | Unbiased assessment of the study endpoint | Follow-up period appropriate to the aim of the study | Loss to follow-up less than 5% | Prospective calculation of the study size |
|------------------------|--------------------|-----------------------------------|--------------------------------|-----------------------------------------------|-------------------------------------------|------------------------------------------------------|--------------------------------|-------------------------------------------|
| Benelli G(45)          | Adequate           | Unclear                           | Adequate                       | Death: Adequate                               | -                                         | Inadequate                                           | Unclear                        | Unclear                                   |
| Chen Xiaoping(47)      | Adequate           | Unclear                           | Inadequate                     | Death: Adequate                               | -                                         | Inadequate*                                          | Adequate                       | Unclear                                   |
| Chen Xu(48)            | Adequate           | Adequate                          | Inadequate                     | Death: Adequate                               | -                                         | Inadequate                                           | Adequate                       | Unclear                                   |
| Cheng Y(49)            | Adequate           | Adequate                          | Inadequate                     | Death: Adequate                               | -                                         | Inadequate                                           | Adequate                       | Unclear                                   |
| Cummings MJ(50)        | Adequate           | Unclear                           | Adequate                       | Death: Adequate                               | -                                         | Inadequate*                                          | Adequate                       | Unclear                                   |
| Fan L(51)              | Adequate           | Adequate                          | Inadequate                     | Death: Adequate<br>ARDS: Inadequate           | ARDS: Unclear                             | Unclear                                              | Adequate                       | Unclear                                   |
| Feng Z(52)             | Adequate           | Unclear                           | Inadequate                     | Death: Adequate                               | -                                         | Inadequate*                                          | Adequate                       | Unclear                                   |
| Fu L(53)               | Adequate           | Unclear                           | Adequate                       | Death: Adequate                               | -                                         | Adequate                                             | Adequate                       | Unclear                                   |
| Giorgi Rossi P(54)     | Adequate           | Unclear                           | Inadequate                     | Death: Adequate                               | -                                         | Inadequate                                           | Adequate                       | Unclear                                   |
| Hu L(55)               | Adequate           | Unclear                           | Inadequate                     | Death: Adequate<br>ARDS: Inadequate           | ARDS: Unclear                             | Inadequate*                                          | Adequate                       | Unclear                                   |
| Jiang X(56)            | Adequate           | Unclear                           | Inadequate                     | Death: Adequate<br>ARDS: Adequate             | ARDS: Unclear                             | Adequate                                             | Adequate                       | Unclear                                   |
| Joharatnam-Hogan N(57) | Adequate           | Adequate                          | Inadequate                     | Death: Adequate                               | -                                         | Unclear                                              | Adequate                       | Unclear                                   |
| Liu J(58)              | Adequate           | Unclear                           | Inadequate                     | Death: Adequate<br>ARDS: Inadequate           | ARDS: Unclear                             | Inadequate                                           | Adequate                       | Unclear                                   |
| Liu Qibin(59)          | Adequate           | Inadequate                        | Inadequate                     | Death: Adequate                               | -                                         | Adequate                                             | Unclear                        | Unclear                                   |
| Liu Qibin(60)          | Adequate           | Inadequate                        | Inadequate                     | Death: Adequate                               | -                                         | Unclear                                              | Adequate                       | Unclear                                   |
| Liu Yanli(61)          | Adequate           | Unclear                           | Inadequate                     | Death: Adequate<br>ARDS: Adequate             | ARDS: Unclear                             | Inadequate                                           | Adequate                       | Unclear                                   |
| Liu Youbin(62)         | Adequate           | Unclear                           | Inadequate                     | Death: Adequate<br>ARDS: Adequate             | ARDS: Unclear                             | Unclear                                              | Adequate                       | Unclear                                   |
| Lu X(63)               | Adequate           | Unclear                           | Inadequate                     | Death: Adequate                               | -                                         | Unclear                                              | Adequate                       | Unclear                                   |
| Magagnoli J(64)        | Adequate           | Inadequate                        | Inadequate                     | Death: Adequate                               | -                                         | Adequate                                             | Adequate                       | Unclear                                   |
| Qi D(65)               | Adequate           | Inadequate                        | Inadequate                     | Death: Adequate<br>ARDS: Adequate             | ARDS: Unclear                             | Inadequate                                           | Adequate                       | Unclear                                   |
| Qiu C(66)              | Adequate           | Unclear                           | Inadequate                     | Death: Adequate<br>ARDS: Adequate             | ARDS: Unclear                             | Inadequate                                           | Adequate                       | Unclear                                   |
| Rubin SJ(67)           | Adequate           | Unclear                           | Inadequate                     | Death: Adequate<br>ARDS: Inadequate           | ARDS: Unclear                             | Unclear                                              | Adequate                       | Unclear                                   |
| Wang Z(68)             | Adequate           | Unclear                           | Inadequate                     | Death: Adequate                               | -                                         | Unclear                                              | Adequate                       | Unclear                                   |
| Wen Y(69)              | Adequate           | Unclear                           | Inadequate                     | Death: Adequate                               | -                                         | Inadequate                                           | Adequate                       | Unclear                                   |
| Wu C(70)               | Adequate           | Inadequate                        | Inadequate                     | Death: Adequate<br>ARDS: Inadequate           | ARDS: Unclear                             | Adequate                                             | Adequate                       | Unclear                                   |
| Wu Y(71)               | Adequate           | Unclear                           | Inadequate                     | Death: Adequate                               | -                                         | Inadequate                                           | Adequate                       | Unclear                                   |
| Xiao G(72)             | Adequate           | Unclear                           | Inadequate                     | Death: Adequate                               | -                                         | Unclear                                              | Adequate                       | Unclear                                   |
| Xu H(73)               | Adequate           | Adequate                          | Inadequate                     | Death: Adequate<br>ARDS: Adequate             | ARDS: Unclear                             | Unclear                                              | Adequate                       | Unclear                                   |
| Xu S(74)               | Adequate           | Unclear                           | Inadequate                     | Death: Adequate                               | -                                         | Unclear                                              | Inadequate                     | Unclear                                   |

|             |          |          |            |                                     |               |             |          |         |
|-------------|----------|----------|------------|-------------------------------------|---------------|-------------|----------|---------|
| Xu Y(75)    | Adequate | Adequate | Inadequate | Death: Adequate<br>ARDS: Inadequate | ARDS: Unclear | Inadequate  | Adequate | Unclear |
| Yan S(76)   | Adequate | Unclear  | Inadequate | Death: Adequate<br>ARDS: Adequate   | ARDS: Unclear | Adequate    | Adequate | Unclear |
| Zeng L(77)  | Adequate | Unclear  | Inadequate | Death: Adequate                     | -             | Inadequate  | Adequate | Unclear |
| Zhang G(78) | Adequate | Unclear  | Inadequate | Death: Adequate<br>ARDS: Adequate   | ARDS: Unclear | Inadequate  | Adequate | Unclear |
| Zhao W(79)  | Adequate | Unclear  | Inadequate | Death: Adequate<br>ARDS: Adequate   | ARDS: Unclear | Inadequate* | Adequate | Unclear |

\*Patients followed-up for at least 2 weeks, until discharge or death

**Table S7.** Patient demographics and clinical characteristics at study entry in peer-reviewed studies

| Study            | Patients<br>No. | Male<br>No. (%) | Age<br>years | Severity of         | Patients with            | Respiratory system | Cardiovascular     | Chronic kidney     | Diabetes   | Hypertension | Cancer    | Co-infection |
|------------------|-----------------|-----------------|--------------|---------------------|--------------------------|--------------------|--------------------|--------------------|------------|--------------|-----------|--------------|
|                  |                 |                 |              | COVID-19<br>No. (%) | comorbidities<br>No. (%) | disease<br>No. (%) | disease<br>No. (%) | disease<br>No. (%) | No. (%)    | No. (%)      | No. (%)   | No. (%)      |
| Cao B(30)        | 199             | 120 (60.3)      | 58           | 199 (100) §         | 42 (21.1)                | -                  | 13 (6.5)           | -                  | 23 (11.6)  | -            | 6 (3.0)   | 7 (3.5)      |
| Cao J(31)        | 102             | 53(52.0)        | 54           | 102 (100)           | 47 (46.1)                | 10 (9.8)           | 11 (10.8)          | 4 (3.9)            | 11 (10.8)  | 28 (27.5)    | 4 (3.9)   | -            |
| Chen J(32)       | 249             | 126 (50.6)      | 51           | -                   | 90 (36.1)                | 5 (2.0)            | 55 (21.7)          | -                  | -          | -            | 1 (0.4)   | -            |
| Chen N(4)        | 99              | 67 (67.7)       | 56           | -                   | 50 (50.5)                | 1 (1.0)            | 40 (40.4)          | -                  | 12 (12.1)  | -            | 1 (1.0)   | 5 (5.1)      |
| Chen T(33)       | 203             | 108 (53.2)      | 54           | 107 (52.7) ‡        | 88 (43.3)                | 8 (3.9)            | 25 (12.3)          | 8 (3.9)            | 16 (7.9)   | 43 (21.2)    | 7 (3.4)   | -            |
| Cui S(34)        | 81              | 37 (45.7)       | 60           | 81 (100)            | 33 (40.7)                | -                  | 10 (12.3)          | -                  | 8 (9.9)    | 20 (24.7)    | -         | -            |
| Fan Z(35)        | 148             | 75 (50.7)       | 50           | -                   | -                        | -                  | -                  | -                  | -          | -            | -         | -            |
| Feng Y(36)       | 476             | 271 (56.9)      | 53           | 124 (26.1) ‡        | 205 (43.1)               | 22 (4.6)           | 5 (11.6)           | 4 (0.8)            | 49 (10.3)  | 113 (23.7)   | 12 (2.5)  | -            |
| Gao L(37)        | 54              | 24 (44.4)       | 60           | 54 (100)            | -                        | 2 (3.7)            | 9 (16.7)           | -                  | 8 (14.8)   | 12 (22.2)    | -         | -            |
| Grasselli G(38)  | 1591            | 1304 (82.0)     | 63           | 1591 (100)          | 1043 (65.6)              | 42 (2.6)           | 223 (14.0)         | 36 (2.3)           | 180 (11.3) | 509 (32.0)   | 81 (5.1)  | -            |
| Grein J(39)      | 53              | 40 (75.5)       | 64           | 53 (100)            | 36 (67.9)                | 6 (11.3)           | -                  | -                  | 9 (17.0)   | 13 (24.5)    | -         | -            |
| Guan Wei-jie(40) | 1590            | 904/1578        | 49           | 254 (16.0) †        | 399 (25.1)               | 24 (1.5)           | 8 (5.6)            | 269 (16.9)         | 130 (8.2)  | 269 (16.9)   | 130 (8.2) | -            |
| Guan Wei-jie(41) | 1099            | 640 (58.2)      | 47           | 173 (15.7) †        | 261 (23.7)               | 12 (1.1)           | 42 (3.8)           | 8 (0.7)            | 81 (7.4)   | 165 (15.0)   | 10 (0.9)  | -            |
| Guo T(42)        | 187             | 91 (48.7)       | 58           | -                   | -                        | 4 (2.1)            | 29 (15.5)          | 6 (3.2)            | 28 (15.0)  | 61 (32.6)    | 13 (7.0)  | -            |
| Han H(43)        | 273             | 97 (35.5)       | -            | 75 (27.5) §         | -                        | -                  | -                  | -                  | -          | -            | -         | -            |
| Jin X(44)        | 651             | 331 (50.8)      | -            | 64 (9.8)            | 178 (27.3)               | 1 (0.2)            | 5 (0.8)            | 6 (0.9)            | 48 (7.4)   | 100 (15.4)   | 6 (0.9)   | -            |
| Klok FA(45)      | 184             | 139 (75.5)      | 64           | -                   | -                        | -                  | -                  | -                  | -          | -            | 5 (2.7)   | -            |
| Li R(46)         | 225             | 120 (53.3)      | 50           | 37 (16.4) ‡         | -                        | -                  | -                  | -                  | -          | 47 (20.9)    | -         | -            |
| Li X(47)         | 548             | 279 (50.9)      | 60           | 269 (49.1) †        | -                        | 23 (4.2)           | 34 (6.2)           | 10 (1.8)           | 83 (15.1)  | 166 (30.3)   | 24 (4.4)  | 42 (7.7)     |
| Lian J(48)       | 788             | 381 (48.4)      | -            | 78 (9.9) ‡          | 218 (27.7)               | 3 (0.4)            | 11 (1.4)           | 7 (0.9)            | 57 (7.2)   | 126 (16.0)   | 6 (0.8)   | -            |
| Liu Kay(49)      | 56              | 31 (55.5)       | -            | 4 (6.0)             | -                        | -                  | 2 (3.6)            | 1 (1.8)            | 4 (7.1)    | 10 (17.9)    | -         | 9 (16.1)     |

|                 |      |            |      |              |            |          |           |          |           |            |           |            |
|-----------------|------|------------|------|--------------|------------|----------|-----------|----------|-----------|------------|-----------|------------|
| Liu Kui(50)     | 137  | 61 (44.5)  | 57   | 137 (100) §  | 27 (19.7)  | 2 (1.5)  | 10 (7.3)  | -        | 14 (10.2) | 13 (9.5)   | 2 (1.5)   | -          |
| Liu W(51)       | 78   | 39 (50.0)  | 38   | 8 (10.3) ‡   | 29 (37.2)  | 2 (2.6)  | -         | -        | 5 (6.4)   | 8 (10.3)   | 4 (5.1)   | 0          |
| Qian G(52)      | 91   | 37 (40.6)  | 50   | 9 (9.9) ‡    | -          | -        | 3 (3.3)   | -        | 8 (8.8)   | 15 (16.5)  | -         | -          |
| Shi H(53)       | 81   | 42 (51.9)  | 49   | -            | 21 (25.9)  | 9 (11.1) | 14 (17.3) | 3 (3.7)  | 10 (12.3) | 12 (14.8)  | 4 (4.9)   | -          |
| Shi S(54)       | 416  | 205 (49.3) | 64   | -            | -          | 12 (2.9) | 66 (15.9) | 14 (3.4) | 60 (14.4) | 127 (30.5) | 9 (2.2)   | -          |
| Tang Ning(55)   | 449  | 268 (59.7) | 65   | 449 (100) ‡  | 272 (60.6) | -        | -         | -        | -         | -          | -         | -          |
| Tang Ning(56)   | 183  | 98 (53.6)  | 54   | -            | 75 (41.0)  | 4 (2.2)  | -         | -        | -         | -          | -         | -          |
| Tian S(57)      | 262  | 127 (58.5) | 47   | 46 (17.6) §  | -          | -        | -         | -        | -         | -          | -         | -          |
| Wang D(58)      | 138  | 75 (54.3)  | 56   | -            | 64 (56.4)  | 4 (2.9)  | 27 (19.6) | 4 (2.9)  | 14 (10.1) | 43 (31.2)  | 10 (7.2)  | -          |
| Wang Lang(59)   | 339  | 166 (49.0) | 69   | 239 (70.5) § | -          | 21 (6.2) | 74 (21.8) | 12 (3.5) | 54 (15.9) | 138 (40.7) | 15 (4.4)  | 143 (42.2) |
| Wang Luwen(60)  | 116  | 67 (57.8)  | 54   | 57 (49.1) §  | -          | -        | 7 (6.0)   | 5 (4.3)  | 18 (15.5) | 43 (37.1)  | 12 (10.3) | -          |
| Wang Yang(61)   | 344  | 179 (52.0) | 64   | 344 (100) ‡  | -          | 16 (4.7) | 40 (11.6) | -        | 64 (18.6) | 141 (41.0) | -         | -          |
| Wang Yuhui(62)  | 90   | 33 (36.7)  | 45   | -            | -          | -        | -         | -        | -         | -          | -         | -          |
| Wang Z(63)      | 69   | 32 (46.0)  | 42   | -            | -          | 6 (8.7)  | 8 (12.0)  | -        | 7 (10.0)  | 9 (13.0)   | 4 (16)    | -          |
| Wu C(64)        | 201  | 128 (63.7) | 51   | -            | -          | 5 (2.5)  | 8 (4.0)   | 2 (1.0)  | 22 (10.9) | 39 (19.4)  | 1 (0.5)   | 1 (0.5)    |
| Wu J(65)        | 80   | 39 (48.8)  | 46   | 3 (3.8) ‡    | -          | 1 (1.3)  | 25 (31.3) | 1 (1.3)  | 5 (6.3)   | -          | 1 (1.3)   | 12 (15.0)  |
| Xu XW(66)       | 62   | 35 (56.5)  | 41   | -            | 20 (32.3)  | 1 (1.6)  | 1 (1.6)   | 1 (1.6)  | 1 (1.6)   | 5 (8.1)    | -         | -          |
| Yang W(67)      | 149  | 81 (54.4)  | 45   | 0§           | -          | 1 (0.7)  | 28 (18.8) | -        | 9 (6.0)   | -          | 2 (1.3)   | -          |
| Yang Xiaobo(68) | 52   | 35 (67.3)  | 59   | 52 (100) §   | 21 (40.4)  | 4 (7.7)  | 12 (23.1) | -        | 9 (17.3)  | -          | 2 (3.8)   | 8 (15.4)   |
| Yang Xiaobo(69) | 1476 | 776 (52.6) | -    | -            | -          | -        | -         | -        | -         | -          | -         | -          |
| Zhang J(70)     | 663  | 321 (48.4) | 55.6 | 409 (61.7) § | 247 (37.3) | 51 (7.7) | -         | -        | -         | -          | 14 (2.1)  | -          |
| Zhang L(71)     | 343  | 169 (49.3) | 62   | -            | 120 (35.0) | 8 (2.3)  | 27 (7.9)  | 4 (1.2)  | 47 (13.7) | 76 (22.2)  | 9 (2.6)   | -          |
| Zhou F(72)      | 191  | 119 (62.3) | 56   | 119 (62.3) ‡ | 91 (47.6)  | 6 (3.1)  | 15 (7.9)  | 2 (1.0)  | 36 (18.8) | 58 (30.4)  | 2 (1.0)   | 28 (14.7)  |



† = American Thoracic Society definition; ‡ = National Health Commission of the People's Republic of China definition; § = World Health Organization definition, || = other definition

**Table S8.** Treatment provided in peer-reviewed studies

| Study            | Patients No. | Antiviral therapy No. (%) | Antibiotic therapy No. (%) | Glucocorticoids No. (%) | Immunoglobulin therapy No. (%) | Supplemental oxygen No. (%) | NIV No. (%) | IMV No. (%) | ECMO No. (%) | CRRT No. (%) |
|------------------|--------------|---------------------------|----------------------------|-------------------------|--------------------------------|-----------------------------|-------------|-------------|--------------|--------------|
| Cao B(1)         | 199          | 95 (47.7)                 | 189 (95.0)                 | 67 (33.7)               | -                              | 170 (85.4)                  | 29 (14.6)   | 32 (16.1)   | 4 (2.0)      | 9 (4.5)      |
| Cao J(2)         | 102          | 102 (100)                 | 101 (99.0)                 | 51 (50.0)               | 11 (10.8)                      | 76 (74.5)                   | 4 (4.9)     | 14 (13.7)   | 3 (2.9)      | 6 (5.9)      |
| Chen J(3)        | 249          | -                         | -                          | 32 (12.9)               | -                              | -                           | -           | -           | -            | -            |
| Chen N(4)        | 99           | 75 (75.8)                 | 70 (70.7)                  | 19 (19.2)               | 27 (27.3)                      | 75 (75.8)                   | 13 (13.1)   | 4 (84.0)    | 3 (3.0)      | 9 (9.1)      |
| Chen T(5)        | 203          | 131 (64.5)                | -                          | 107 (52.7)              | 11 (5.4)                       | 123 (60.6)                  | -           | -           | -            | -            |
| Cui S(6)         | 81           | 81 (100)                  | -                          | -                       | -                              | -                           | -           | -           | -            | -            |
| Fan Z(7)         | 148          | -                         | -                          | -                       | -                              | -                           | -           | -           | -            | -            |
| Feng Y(8)        | 476          | 286 (60.1)                | 319 (67.0)                 | 127 (26.7)              | -                              | -                           | 34 (7.1)    | 39 (8.2)    | 4 (0.8)      | -            |
| Gao L(9)         | 54           | -                         | -                          | -                       | -                              | -                           | -           | -           | -            | -            |
| Grasselli G(10)  | 1591         | -                         | -                          | -                       | -                              | 13 (1.0)                    | 137 (11.0)  | 1150 (88.0) | -            | -            |
| Grein J(11)      | 53           | 53 (100)                  | -                          | -                       | -                              | 15 (28.3)                   | 2 (3.7)     | 30 (88.0)   | 4 (12.0)     | -            |
| Guan Wei-jie(12) | 1590         | -                         | -                          | -                       | -                              | -                           | -           | 50 (3.1)    | -            | -            |
| Guan Wei-jie(13) | 1099         | 393 (35.8)                | 637 (58.0)                 | 204 (18.6)              | 144 (13.1)                     | 454 (41.3)                  | 25 (2.3)    | 56 (5.1)    | 5 (0.5)      | 9 (0.8)      |
| Guo T(14)        | 187          | 166 (88.8)                | 183 (97.9)                 | 106 (56.7)              | 21 (11.2)                      | -                           | -           | -           | -            | -            |
| Han H(15)        | 273          | -                         | -                          | -                       | -                              | -                           | -           | -           | -            | -            |
| Jin X(16)        | 651          | 546 (83.9)                | 277 (42.5)                 | 74 (11.4)               | -                              | -                           | -           | 17 (2.6)    | 0            | 0            |
| Klok FA(17)      | 184          | -                         | -                          | -                       | -                              | -                           | -           | -           | -            | 23 (12.5)    |
| Li R(18)         | 225          | -                         | -                          | -                       | -                              | -                           | -           | -           | -            | -            |
| Li X(19)         | 548          | -                         | -                          | 341 (62.2)              | 213 (38.9)                     | 228 (41.6)                  | 78 (14.2)   | 25 (4.6)    | -            | 2 (0.4)      |
| Lian J(20)       | 788          | 668 (84.8)                | -                          | 100 (12.7)              | 62 (7.9)                       | -                           | 7 (0.9)     | 11 (1.4)    | 0            | 0            |
| Liu Kay(21)      | 56           | 53 (94.6)                 | 40 (71.4)                  | -                       | 9 (16.1)                       | 54 (96.4)                   | 3 (5.4)     | 7 (12.5)    | 2 (3.6)      | 5 (8.9)      |
| Liu Kui(22)      | 137          | 105 (76.6)                | 119 (86.9)                 | 40 (29.2)               | 44 (32.1)                      | 119 (86.9)                  | 34 (24.8)   | -           | -            | -            |

|                 |      |            |            |            |            |            |           |            |          |          |
|-----------------|------|------------|------------|------------|------------|------------|-----------|------------|----------|----------|
| Liu W(23)       | 78   | 78 (100)   | 78 (100)   | 45 (57.7)  | 14 (17.9)  | 78 (100)   | 5 (6.4)   | 0          | 0        | 0        |
| Qian G(24)      | 91   | -          | -          | -          | -          | -          | -         | -          | -        | -        |
| Shi H(25)       | 81   | -          | -          | -          | -          | -          | -         | -          | -        | -        |
| Shi S(26)       | 416  | 403 (96.9) | 235 (56.5) | 304 (73.1) | 259 (62.3) | 367 (88.2) | 51 (12.3) | 32 (7.7)   | -        | 2 (0.5)  |
| Tang Ning(27)   | 449  | -          | -          | -          | -          | -          | -         | -          | -        | -        |
| Tang Ning(28)   | 183  | -          | -          | -          | -          | -          | -         | -          | -        | -        |
| Tian S(29)      | 262  | -          | -          | -          | -          | -          | -         | -          | -        | -        |
| Wang D(30)      | 138  | 124 (89.9) | -          | 62 (44.9)  | -          | 106 (76.8) | 15 (10.9) | 17 (12.3)  | 4 (82.9) | 2 (1.4)  |
| Wang Lang(31)   | 339  | -          | -          | -          | -          | -          | -         | -          | -        | -        |
| Wang Luwen(32)  | 116  | -          | -          | -          | -          | -          | -         | -          | -        | -        |
| Wang Yang(33)   | 344  | -          | -          | -          | -          | -          | 34 (9.9)  | 100 (29.1) | -        | -        |
| Wang Yuhui(34)  | 90   | -          | -          | -          | -          | -          | -         | -          | -        | -        |
| Wang Z(35)      | 69   | 66 (98.5)* | 66 (98.5)* | 10 (14.9)* | -          | -          | -         | -          | -        | -        |
| Wu C(36)        | 201  | 170 (84.6) | 196 (97.5) | 62 (30.8)  | -          | 159 (79.1) | 61 (30.3) | 6 (3.0)    | 1(0.5)   | -        |
| Wu J(37)        | 80   | 80 (100)   | 73 (91.3)  | -          | 16 (20.0)  | -          | 35 (43.8) | 0          | 0        | -        |
| Xu XW(38)       | 62   | 55 (88.7)  | 28 (45.2)  | 16 (25.8)  | 16 (25.8)  | -          | -         | 1 (1.8)    | -        | -        |
| Yang W(39)      | 149  | 140 (94.0) | 34 (22.8)  | 5 (3.4)    | 19 (12.8)  | 134 (89.9) | 2 (1.3)   | 0          | 0        | -        |
| Yang Xiaobo(40) | 52   | 23 (44.2)  | 49 (94.2)  | 30 (57.7)  | 28 (53.8)  | 52 (100)   | 29 (55.8) | 22 (42.3)  | 6 (11.5) | 9 (17.3) |
| Yang Xiaobo(41) | 1476 | -          | -          | -          | -          | -          | -         | -          | -        | -        |
| Zhang J(42)     | 663  | -          | -          | -          | -          | -          | -         | -          | -        | -        |
| Zhang L(43)     | 343  | -          | -          | -          | -          | -          | -         | -          | -        | -        |
| Zhou F(44)      | 191  | 41 (21.5)  | 181 (94.8) | 57 (29.8)  | 46 (24.1)  | -          | 26 (13.6) | 32 (16.8)  | 3 (1.6)  | 10 (5.2) |

\*Data available only for 67 patients. CRRT: chronic renal replacement therapy; ECMO: extra-corporeal membrane oxygenation; IMV: invasive mechanical ventilation, NIV: non-invasive ventilation

**Table S9.** Patient demographics and clinical characteristics at study entry in not peer-reviewed studies

| Study                  | Patients No. | Male No. (%) | Age years | Severity of COVID-19 No. (%) | Patients with Comorbidities No. (%) | Respiratory system disease No. (%) | Cardiovascular disease No. (%) | Chronic kidney disease No. (%) | Diabetes No. (%) | Hypertension No. (%) | Cancer No. (%) |
|------------------------|--------------|--------------|-----------|------------------------------|-------------------------------------|------------------------------------|--------------------------------|--------------------------------|------------------|----------------------|----------------|
| Benelli G(45)          | 411          | 359 (66.6)   | 71        | -                            | 256 (62.3)                          | 48 (11.7)                          | 93 (22.6)                      | 22 (5.6)                       | 76 (18.5)        | 193 (47.0)           | 33 (8.0)       |
| Chen C(46)             | 236          | 110 (46.6)   | -         | 27 (11.4)§                   | -                                   | -                                  | -                              | -                              | 27 (11.4)        | 66 (28.0)            | -              |
| Chen Xiaoping(47)      | 123          | 50 (40.7)    | 51        | 33 (26.8)§                   | 35 (28.5)                           | -                                  | 8 (6.5)                        | -                              | 12 (9.8)         | 19 (15.4)            | 5 (4.1)        |
| Chen Xu(48)            | 291          | 145 (49.8)   | 46        | 50 (17.2)§                   | 93 (32.0)                           | 10 (3.4)                           | 20 (6.9)                       | 2 (0.7)                        | 22 (7.6)         | 8 (2.7)              | 2 (0.7)        |
| Cheng Y(49)            | 710          | 374 (52.7)   | 63        | 252 (35.5)‡                  | -                                   | -                                  | -                              | -                              | -                | -                    | -              |
| Cummings MJ(50)        | 257          | 170 (66.1)   | 62        | 257 (100)¶                   | 212 (82.5)                          | 45 (17.5)                          | -                              | 37 (14.4)                      | 92 (35.8)        | 162 (63.0)           | 18 (7.0)       |
| Fan L(51)              | 55           | 30           | 47        | 8 (14.5)‡                    | 19 (34.5)                           | -                                  | 3 (5.5)                        | -                              | 8 (14.4)         | 8 (14.5)             | -              |
| Feng Z(52)             | 564          | 284          | 47        | 69 (12.2)¶                   | 132 (21.8)                          | 16 (2.8)                           | -                              | 3 (0.5)                        | 45 (8.0)         | 82 (14.5)            | 4 (0.7)        |
| Fu L(53)               | 200          | 99 (49.5)    | -         | 109 (54.5)¶                  | 161 (80.5)                          | 8 (4.0)                            | 16 (8.0)                       | -                              | 137 (68.5)       | 101 (50.5)           | -              |
| Giorgi Rossi P(54)     | 2653         | 1328         | -         | -                            | -                                   | 128 (4.8)                          | 168 (6.3)                      | 59 (2.2)                       | 284 (10.7)       | 430 (16.2)           | 301 (11.3)     |
| Hu L(55)               | 323          | 166 (51.4)   | 61        | 172 (53.3)§                  | -                                   | 29 (9.0)                           | 41 (12.7)                      | 7 (2.2)                        | 47 (14.6)        | 105 (32.5)           | 5 (1.5)        |
| Jiang X(56)            | 55           | 27           | 45        | 8 (14.5)‡                    | 29 (52.7)                           | -                                  | 3 (5.5)                        | 1 (1.8)                        | 9 (16.4)         | 17 (31.0)            | 2 (3.6)        |
| Joharatnam-Hogan N(57) | 52           | 31           | -         | -                            | 52 (100)                            | -                                  | -                              | -                              | -                | -                    | 26 (50.0)      |
| Liu J(58)              | 64           | 23 (35.9)    | 35        | 1 (1.6)¶                     | 8 (12.5)                            | -                                  | -                              | -                              | 1 (1.6)          | 3 (4.7)              | -              |
| Liu Qibin(59)          | 504          | 259          | -         | -                            | 262 (52.0)                          | -                                  | -                              | -                              | -                | -                    | -              |
| Liu Qibin(60)          | 340          | 172          | -         | -                            | 130 (38.2)                          | 11 (3.2)                           | 24 (7.1)                       | -                              | 8 (2.4)          | 84 (24.7)            | -              |
| Liu Yanli(61)          | 109          | 59 (54.1)    | 55        | -                            | -                                   | 4 (3.7)                            | 13 (11.9)                      | 10 (9.2)                       | 12 (11.0)        | 37 (33.9)            | -              |
| Liu Youbin(62)         | 291          | 133 (45.7)   | 48        | -                            | -                                   | -                                  | 12 (4.1)                       | -                              | 22 (7.6)         | 54 (18.6)            | -              |
| Lu X(63)               | 244          | 128          | 62        | 244 (100)§                   | -                                   | 12 (4.9)                           | 28 (11.5)                      | -                              | 44 (18.0)        | 95 (38.9)            | -              |
| Magagnoli J(64)        | 368          | 368          | -         | -                            | -                                   | 94 (25.5)                          | -                              | 92 (25.0)                      | 249 (67.7)       | -                    | 66 (17.9)      |
| Qi D(65)               | 267          | 149 (55.8)   | 48        | 50 (18.7)†                   | 41 (15.4)                           | 25 (9.4)                           | 13 (4.9)                       | -                              | 26 (9.7)         | 20 (7.5)             | -              |
| Qiu C(66)              | 104          | 49 (47.1)    | 43        | 16 (15.4)¶                   | -                                   | 1 (1.0)                            | 7 (6.7)                        | -                              | 12 (11.5)        | 15 (14.4)            | -              |
| Rubin SJ(67)           | 54           | 29           | 54        | -                            | -                                   | 7 (13.0)                           | 3 (5.6)                        | 3 (5.6)                        | 7 (13.0)         | 14 (25.9)            | -              |
| Wang Z(68)             | 538          | 285          | -         | 88 (16.4)‡                   | -                                   | -                                  | -                              | -                              | -                | -                    | -              |

|             |     |            |    |                         |           |          |           |         |            |            |         |
|-------------|-----|------------|----|-------------------------|-----------|----------|-----------|---------|------------|------------|---------|
| Wen Y(69)   | 417 | 197 (47.2) | 45 | 36 (8.6) <sub>  </sub>  | -         | -        | -         | -       | -          | -          | -       |
| Wu C(70)    | 188 | 119 (63.3) | 52 | -                       | 64 (34.0) | 2 (1.1)  | 12 (6.4)  | 3 (1.6) | 20 (10.6)  | 38 (20.2)  | -       |
| Wu Y(71)    | 297 | 147 (49.5) | -  | 83 (27.9) <sub>§</sub>  | -         | -        | -         | -       | -          | -          | -       |
| Xiao G(72)  | 287 | 160        | 62 | 124 (43.2) <sub>†</sub> | -         | 16 (5.6) | 33 (11.5) | -       | 45 (15.7)  | -          | 8 (2.8) |
| Xu H(73)    | 53  | 28 (52.8)  | -  | 8 (15.1) <sub>‡</sub>   | -         | 3 (5.7)  | 6 (11.3)  | -       | 8 (15.1)   | 8 (15.1)   | -       |
| Xu S(74)    | 355 | 193 (54.4) | -  | 131 (36.9) <sub>§</sub> | -         | -        | -         | -       | 147 (41.4) | 125 (35.2) | -       |
| Xu Y(75)    | 69  | 35 (50.7)  | 57 | 25 (36.2) <sub>§</sub>  | 0         | 0        | 0         | 0       | 0          | 0          | 0       |
| Yan S(76)   | 168 | 81 (48.2)  | 51 | 36 (21.4) <sub>‡</sub>  | -         | 12 (7.1) | 12 (7.1)  | 1 (0.6) | 12 (7.1)   | 24 (14.3)  | 2 (1.2) |
| Zeng L(77)  | 338 | -          | -  | -                       | -         | -        | -         | -       | -          | -          | -       |
| Zhang G(78) | 221 | 108 (48.9) | 55 | 55 (24.9) <sub>§</sub>  | 78 (35.3) | 6 (2.7)  | 37 (16.7) | 6 (2.7) | 22 (10.0)  | 54 (24.4)  | 9 (4.1) |
| Zhao W(79)  | 77  | 34 (44.2)  | 52 | 20 (26.0) <sub>§</sub>  | 24 (31.2) | 6 (7.8)  | 11 (14.3) | 5 (6.5) | 6 (7.8)    | 16 (20.8)  | 4 (5.2) |

\*Data available for 1578 patients ; † = American Thoracic Society definition; ‡ = National Health Commission of the People's Republic of China definition; § = World Health Organization definition, || = other definition



|             |     |            |            |           |   |           |           |           |          |         |
|-------------|-----|------------|------------|-----------|---|-----------|-----------|-----------|----------|---------|
| Wen Y(69)   | 417 | -          | -          | -         | - | -         | -         | -         | -        | -       |
| Wu C(70)    | 188 | 158 (84.0) | 185 (98.4) | 59 (31.4) | - | -         | -         | -         | -        | -       |
| Wu Y(71)    | 297 | -          | -          | -         | - | -         | -         | -         | -        | -       |
| Xiao G(72)  | 287 | -          | -          | -         | - | -         | -         | -         | -        | -       |
| Xu H(73)    | 53  | 53 (100)   | 14 (26.4)  | -         | - | 53 (100)  | 8 (15.1)  | 3 (5.7)   | -        | 4 (7.5) |
| Xu S(74)    | 355 | -          | -          | -         | - | -         | -         | -         | -        | -       |
| Xu Y(75)    | 69  | 38 (55.1)  | 31 (44.9)  | 6 (8.7)   | - | 35 (50.7) | 3 (4.3)   | 2 (2.9)   | 0        | -       |
| Yan S(76)   | 168 | 155 (92.3) | 119 (70.8) | 27 (16.1) | - | 97 (57.7) | 13 (7.7)  | 12 (7.1)  | -        | -       |
| Zeng L(77)  | 338 | -          | -          | -         | - | -         | -         | -         | -        | 5 (1.5) |
| Zhang G(78) | 221 | 196 (88.7) | -          | 64 (29.0) | - | -         | 27 (12.2) | 26 (11.8) | 10 (4.5) | -       |
| Zhao W(79)  | 77  | -          | -          | -         | - | -         | -         | -         | -        | -       |

CRRT: chronic renal replacement therapy; ECMO: extra-corporeal membrane oxygenation; IMV: invasive mechanical ventilation, NIV: non-invasive ventilation

**Table S11.** Clinical outcomes of patients in peer-reviewed studies

| Study            | Patients<br>No. | Clinical improvement,            | Still in hospital at    | Admission to   | All-cause            | ARDS<br>No. (%) | Acute cardiac     | Venous                     | Shock    | AKI       | Coagulopathy |
|------------------|-----------------|----------------------------------|-------------------------|----------------|----------------------|-----------------|-------------------|----------------------------|----------|-----------|--------------|
|                  |                 | recovery or discharge<br>No. (%) | end of study<br>No. (%) | ICU<br>No. (%) | mortality<br>No. (%) |                 | injury<br>No. (%) | thromboembolism<br>No. (%) | No. (%)  | No. (%)   | No. (%)      |
| Cao B(30)        | 199             | 148 (74.4)                       | -                       | -              | 44 (22.1)            | 39 (19.6)       | -                 | -                          | 4 (2.0)  | 9 (4.5)   | 2 (1.0)      |
| Cao J(31)        | 102             | 85 (83.3)                        | 0                       | 18 (17.6)      | 17 (16.7)            | 1 (1.0)         | 4 (3.9)           | -                          | -        | -         | -            |
| Chen J(32)       | 249             | 215 (86.3)                       | 32 (12.9)               | 22 (8.8)       | 2 (0.8)              | 8 (3.2)         | -                 | -                          | -        | -         | -            |
| Chen N(4)        | 99              | 31 (31.3)                        | 57 (57.6)               | 23 (23.2)      | 11(11.1)             | 17 (17.2)       | -                 | -                          | 4 (4.0)  | 3 (3.0)   | -            |
| Chen T(33)       | 203             | 177 (87.2)                       | 0                       | -              | 26 (12.8)            | 18 (8.9)        | 4 (2.0)           | -                          | 2 (1.0)  | -         | 1 (0.5)      |
| Cui S(34)        | 81              | 64 (79.0)                        | 9 (11.1)                | 81 (100.0)     | 8 (9.9)              | -               | -                 | 20 (24.7)                  | -        | -         | -            |
| Fan Z(35)        | 148             | 92 (62.2)                        | 55 (37.2)               | -              | 1 (0.7)              | -               | -                 | -                          | -        | -         | -            |
| Feng Y(36)       | 476             | 403 (84.7)                       | 23 (4.8)                | -              | 38 (8.0)             | -               | -                 | -                          | -        | -         | -            |
| Gao L(37)        | 54              | -                                | -                       | -              | 18 (33.3)            | -               | -                 | -                          | -        | -         | -            |
| Grasselli G(38)  | 1591            | 256 (16.2)#                      | 920/581                 | 1591 (100.0)   | 405/1581             | -               | -                 | -                          | -        | -         | -            |
| Grein J(39)      | 53              | 25 (47.2)                        | -                       | -              | 7 (13.2)             | 2 (3.8)         | -                 | 3 (5.7)                    | 2 (3.8)  | 3 (5.7)   | -            |
| Guan Wei-jie(40) | 1590            | -                                | -                       | 99 (6.2)       | 50 (3.1)             | -               | -                 | -                          | -        | -         | -            |
| Guan Wei-jie(41) | 1099            | 55 (5.0)                         | -                       | 55 (5.0)       | 15 (1.4)             | 37 (3.4)        | -                 | -                          | 12 (1.1) | 6 (0.5)   | 1 (0.1)      |
| Guo T(42)        | 187             | 144 (77.0)                       | 0                       | -              | 43 (23.0)            | 46 (24.6)       | -                 | -                          | -        | 18 (9.6)  | 42 (22.5)    |
| Han H(43)        | 273             | 246 (90.1)                       | 3 (1.1)                 | -              | 24 (8.8)             | -               | -                 | -                          | -        | -         | -            |
| Jin X(44)        | 651             | -                                | -                       | 17 (2.6)       | -                    | 17 (2.6)        | -                 | -                          | 2 (0.3)  | -         | -            |
| Klok FA(45)      | 184             | 22 (12.0)                        | 139 (75.5)              | 184 (100.0)    | 23 (12.5)            | -               | -                 | 28 (15.2)                  | -        | -         | -            |
| Li R(46)         | 225             | 20 (8.9)                         | -                       | -              | 2 (0.9)              | -               | -                 | -                          | -        | -         | -            |
| Li X(47)         | 548             | 287 (52.4)                       | 168 (30.7)              | -              | 90 (16.4)            | 210 (38.3)      | 119 (21.7)        | -                          | -        | 95 (17.3) | 41 (7.5)     |
| Lian J(48)       | 788             | 322 (40.9)                       | 446 (56.6)              | 22 (2.8)       | 0                    | 58 (7.4)        | -                 | -                          | 2 (0.3)  | 13 (1.6)  | -            |



|                 |      |             |            |             |            |            |            |   |            |           |           |
|-----------------|------|-------------|------------|-------------|------------|------------|------------|---|------------|-----------|-----------|
| Liu Kay(49)     | 56   | 53 (94.6)   | -          | -           | 3 (5.4)    | 6 (10.7)   | 7 (12.5)   | - | 3 (5.4)    | -         | -         |
| Liu Kui(50)     | 137  | 44 (32.1)   | 77 (56.2)  | -           | 16 (11.7)  | -          | -          | - | -          | -         | -         |
| Liu W(51)       | 78   | 67 (85.9)   | -          | -           | 2 (2.6)    | -          | -          | - | -          | -         | -         |
| Qian G(52)      | 91   | 31 (34.1)   | 60 (65.9)  | -           | 0          | -          | -          | - | -          | -         | -         |
| Shi H(53)       | 81   | 62 (76.5)   | 16 (19.8)  | -           | 3 (3.7)    | -          | -          | - | -          | -         | -         |
| Shi S(54)       | 416  | 40 (9.6)    | 319 (76.9) | -           | 57 (13.7)  | 97 (23.3)  | 82 (19.7)  | - | -          | 8 (1.9)   | 12 (2.9)  |
| Tang Ning(55)   | 449  | 315 (70.2)  | -          | -           | 134 (29.8) | -          | -          | - | -          | -         | -         |
| Tang Ning(56)   | 183  | 78 (42.6)   | 84 (45.9)  | -           | 21 (11.5)  | -          | -          | - | -          | -         | 16 (8.7)  |
| Tian S(57)      | 262  | 45 (17.2)   | 214 (81.7) | -           | 3 (1.1)    | -          | -          | - | -          | -         | -         |
| Wang D(58)      | 138  | 47 (34.1)   | 85 (61.6)  | 36 (26.1)   | 6 (4.3)    | 27 (19.6)  | 10 (7.2)   | - | 12 (8.7)   | 5 (3.6)   | -         |
| Wang Lang(59)   | 339  | 91 (26.8)   | 183 (54.0) | -           | 65 (19.2)  | 71 (20.9)  | 70 (20.6)  | - | 8 (2.4)    | 27 (8.0)  | -         |
| Wang Luwen(60)  | 116  | -           | -          | 11 (9.5)    | 7 (6.0)    | 11 (9.5)   | -          | - | -          | -         | -         |
| Wang Yang(61)   | 344  | 211 (61.3)  | 0          | 344 (100.0) | 133 (38.7) | 145 (42.2) | 111 (32.3) | - | 114 (33.1) | 86 (25.0) | 71 (20.6) |
| Wang Yuhui(62)  | 90   | 70 (77.8)   | 17 (18.9)  | -           | 2 (2.2)    | -          | -          | - | -          | -         | -         |
| Wang Z(63)      | 69   | 18 (26.8)*  | 44 (65.7)* | -           | 5 (0.4)*   | -          | -          | - | -          | -         | -         |
| Wu C(64)        | 201  | 144 (71.6)  | 131 (14.9) | 53 (26.4)   | 44 (21.9)  | 84 (41.8)  | -          | - | -          | -         | -         |
| Wu J(65)        | 80   | 21 (26.3)   | 61 (76.3)  | -           | 0          | 10 (12.5)  | -          | - | -          | 2 (2.5)   | -         |
| Xu XW(66)       | 62   | 1 (1.6)     | 61 (98.4)  | 1 (1.6)     | 0          | 1 (1.6)    | -          | - | -          | -         | -         |
| Yang W(67)      | 149  | 73 (49.0)   | 76 (51.0)  | 0           | 0          | 0          | -          | - | 0          | 0         | -         |
| Yang Xiaobo(68) | 52   | 8 (15.4)    | 12 (23.1)  | 52 (100.0)  | 32 (61.5)  | 35 (67.3)  | 12 (23.1)  | - | -          | 15 (28.8) | -         |
| Yang Xiaobo(69) | 1476 | 1238 (83.9) | 0          | -           | 238 (16.1) | -          | -          | - | -          | -         | -         |
| Zhang J(70)     | 663  | 251 (37.9)  | -          | -           | 25 (3.8)   | -          | -          | - | -          | -         | -         |
| Zhang L(71)     | 343  | -           | -          | -           | 13 (3.8)   | -          | -          | - | -          | -         | -         |
| Zhou F(72)      | 191  | 137 (71.7)  | 0          | 50 (26.2)   | 54 (28.3)  | 59 (30.9)  | 33 (17.3)  | - | 38 (19.9)  | 28 (14.7) | 37 (19.4) |

\*Data available for 67 patients. #Data available for 1581 patients. AKI: acute kidney injury; ARDS: acute respiratory distress syndrome; ICU: intensive care unit.

**Table S12.** Clinical outcomes of patients in not peer-reviewed studies

| Study                  | Patients No. | Clinical improvement, recovery or discharge No. (%) | Still in hospital at end of study No. (%) | Admission to ICU No. (%) | All-cause mortality No. (%) | ARDS No. (%) | Shock No. (%) | Acute kidney injury No. (%) | Acute cardiac injury No. (%) | Coagulopathy No. (%) |
|------------------------|--------------|-----------------------------------------------------|-------------------------------------------|--------------------------|-----------------------------|--------------|---------------|-----------------------------|------------------------------|----------------------|
| Benelli G(45)          | 411          | -                                                   | -                                         | 28 (6.8)                 | 72 (17.5)                   | -            | -             | -                           | -                            | -                    |
| Chen C(46)             | 236          | -                                                   | -                                         | -                        | 0                           | -            | -             | -                           | -                            | -                    |
| Chen Xiaoping(47)      | 123          | 110 (89.4%)                                         | 8 (6.5)                                   | -                        | 5 (4.1)                     | -            | -             | -                           | -                            | -                    |
| Chen Xu(48)            | 291          | 159 (54.6)                                          | 130 (44.7)                                | -                        | 2 (0.7)                     | -            | -             | -                           | -                            | -                    |
| Cheng Y(49)            | 710          | -                                                   | -                                         | -                        | 89 (12.5)                   | -            | -             | 22 (3.1)                    | -                            | -                    |
| Cummings MJ(50)        | 257          | 45 (17.5)                                           | 122 (47.5)                                | -                        | 86 (33.4)                   | -            | -             | -                           | -                            | -                    |
| Fan L(51)              | 55           | 55 (100)                                            | 0                                         | -                        | 0                           | 2 (3.6)      | -             | -                           | -                            | -                    |
| Feng Z(52)             | 564          | -                                                   | -                                         | -                        | 2 (0.3)                     | -            | -             | -                           | -                            | -                    |
| Fu L(53)               | 200          | -                                                   | -                                         | -                        | 34 (17.0)                   | -            | -             | -                           | -                            | -                    |
| Giorgi Rossi P(54)     | 2653         | -                                                   | -                                         | -                        | 217 (8.2)                   | -            | -             | -                           | -                            | -                    |
| Hu L(55)               | 323          | 252 (78.0)                                          | 36 (11.1)                                 | -                        | 35 (10.8)                   | 13 (4.0)     | 43 (13.3)     | 17 (5.3)                    | 24 (7.4)                     | -                    |
| Jiang X(56)            | 55           | 55 (100)                                            | 0                                         | -                        | 0                           | 4 (7.3)      | 1 (1.8)       | 3 (5.5)                     | 1 (1.8)                      | -                    |
| Joharatnam-Hogan N(57) | 52           | -                                                   | -                                         | -                        | 12 (23.1)                   | -            | -             | -                           | -                            | -                    |
| Liu J(58)              | 64           | 34 (53.1)                                           | 30 (46.9)                                 | 0                        | 0                           | -            | -             | -                           | -                            | -                    |
| Liu Qibin(59)          | 504          | -                                                   | -                                         | -                        | 79                          | -            | -             | -                           | -                            | -                    |
| Liu Qibin(60)          | 340          | 310 (91.2)                                          | 0                                         | -                        | 30 (8.8)                    | -            | -             | -                           | -                            | -                    |
| Liu Yanli(61)          | 109          | 78 (71.6)                                           | -                                         | -                        | 31 (28.4)                   | 53 (48.6)    | -             | -                           | -                            | -                    |
| Liu Youbin(62)         | 291          | -                                                   | -                                         | 26 (8.9)                 | 1 (0.3)                     | 3 (1.0)      | -             | -                           | 15 (5.2)                     | -                    |
| Lu X(63)               | 244          | -                                                   | -                                         | -                        | -                           | 87 (35.7)    | 71 (29.1)     | 51 (20.9)                   | 67 (27.5)                    | 41 (16.8)            |
| Magagnoli J(64)        | 368          | 298 (81.0)                                          | 0                                         | -                        | 70 (19.0)                   | -            | -             | -                           | -                            | -                    |
| Qi D(65)               | 267          | 103 (38.6)                                          | 160 (22.5)                                | 53 (19.9)                | 4 (1.5)                     | 33 (12.4)    | 13 (4.9)      | -                           | 3 (1.1)                      | 1 (0.4)              |
| Qiu C(66)              | 104          | 40 (38.5)                                           | 63 (60.6)                                 | 9 (8.7)                  | 1 (1.0)                     | 12 (11.5)    | 2 (1.9)       | 2 (1.9)                     | 3 (2.9)                      | -                    |
| Rubin SJ(67)           | 54           | -                                                   | -                                         | 6 (11.1)                 | -                           | 4 (7.4)      | -             | -                           | -                            | -                    |

|             |     |            |            |           |           |           |          |           |          |         |
|-------------|-----|------------|------------|-----------|-----------|-----------|----------|-----------|----------|---------|
| Wang Z(68)  | 538 | 364 (67.7) | 171 (31.8) | -         | 3 (0.6)   | -         | -        | -         | -        | -       |
| Wen Y(69)   | 417 | 299 (71.7) | 115 (27.6) | -         | 3 (0.7)   | -         | -        | -         | -        | -       |
| Wu C(70)    | 188 | 145 (77.1) | 0          | 50 (26.6) | 43 (22.9) | -         | -        | -         | -        | -       |
| Wu Y(71)    | 297 | -          | -          | -         | 17 (5.7)  | -         | -        | -         | -        | -       |
| Xiao G(72)  | 287 | 188 (65.5) | 80 (27.9)  | -         | 19 (6.6)  | 55 (19.2) | -        | -         | -        | -       |
| Xu H(73)    | 53  | 42 (79.2)  | 8 (15.1)   | 8 (15.1)  | 3 (5.7)   | 10 (18.9) | -        | 5 (9.4)   | -        | -       |
| Xu S(74)    | 355 | -          | -          | -         | 32 (9.0)  | -         | -        | 56 (15.8) | -        | -       |
| Xu Y(75)    | 69  | 4 (5.8)    | -          | -         | 1 (1.4)   | 5 (7.2)   | 3 (4.3)  | -         | 5 (7.2)  | -       |
| Yan S(76)   | 168 | 160 (95.2) | 2 (1.2)    | -         | 6 (3.6)   | 17 (10.1) | 7 (4.2)  | 6 (3.6)   | 4 (2.4)  | 2 (1.2) |
| Zeng L(77)  | 338 | 290 (85.8) | 45 (13.3)  | -         | 3 (0.9)   | -         | -        | -         | -        | -       |
| Zhang G(78) | 221 | 42 (19.0)  | 168 (76.0) | 44 (19.9) | 12 (5.4)  | 48 (21.7) | 15 (6.8) | 10 (4.5)  | 17 (7.7) | -       |
| Zhao W(79)  | 77  | 64 (83.1)  | 8 (10.4)   | -         | 5 (6.5)   | 3 (3.9)   | 1 (1.3)  | 2 (2.6)   | 2 (2.6)  | -       |

ARDS: acute respiratory distress syndrome; ICU: intensive care unit

**Figure S1.** PRISMA flow diagram

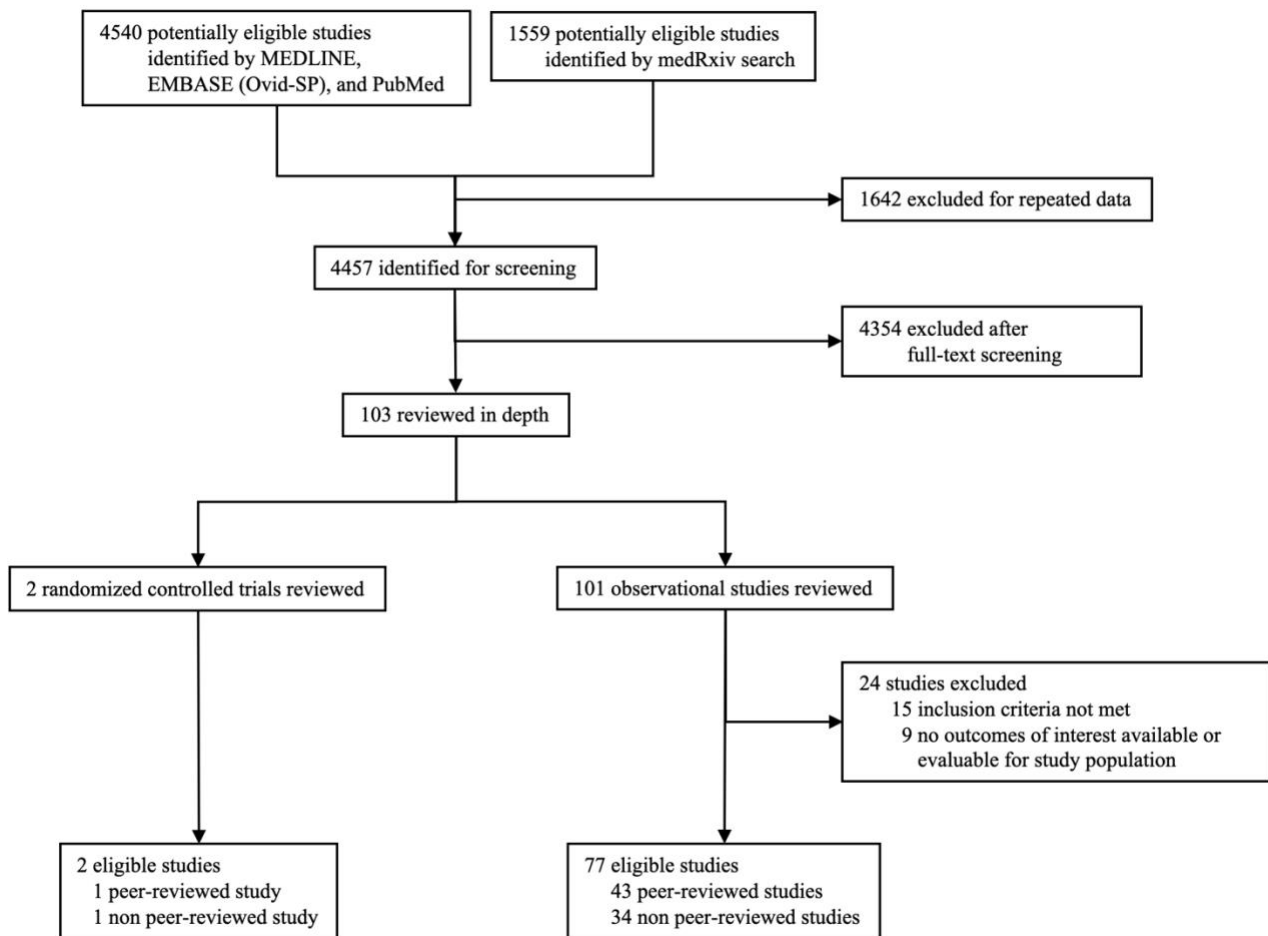

**Figure S2.** MINORS quality assessment for peer reviewed (panel A) and not peer-reviewed (panel B) studies

A

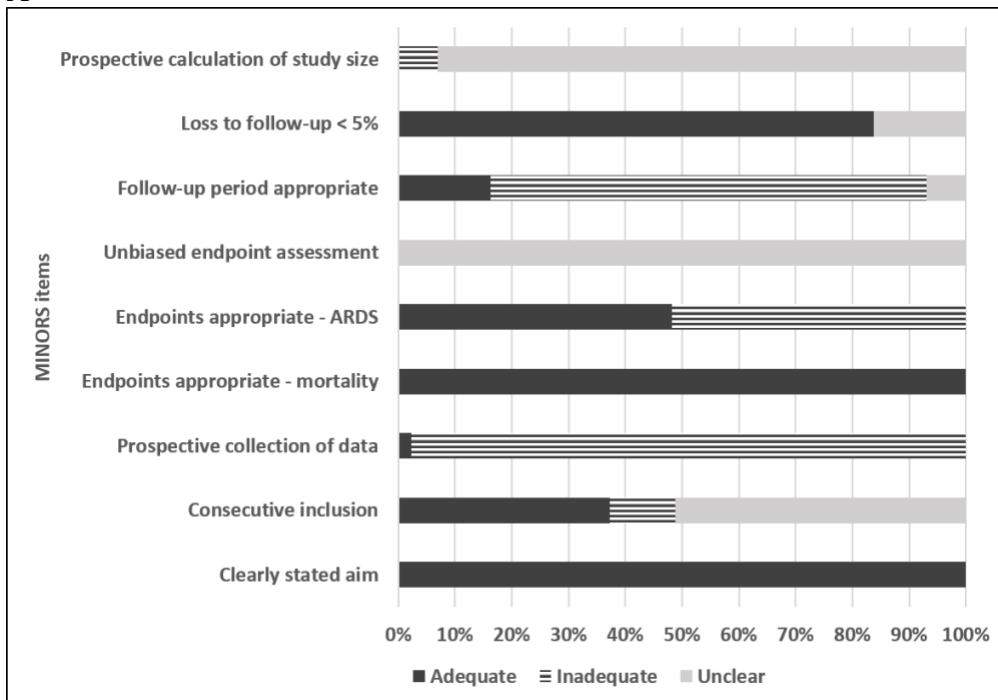

B

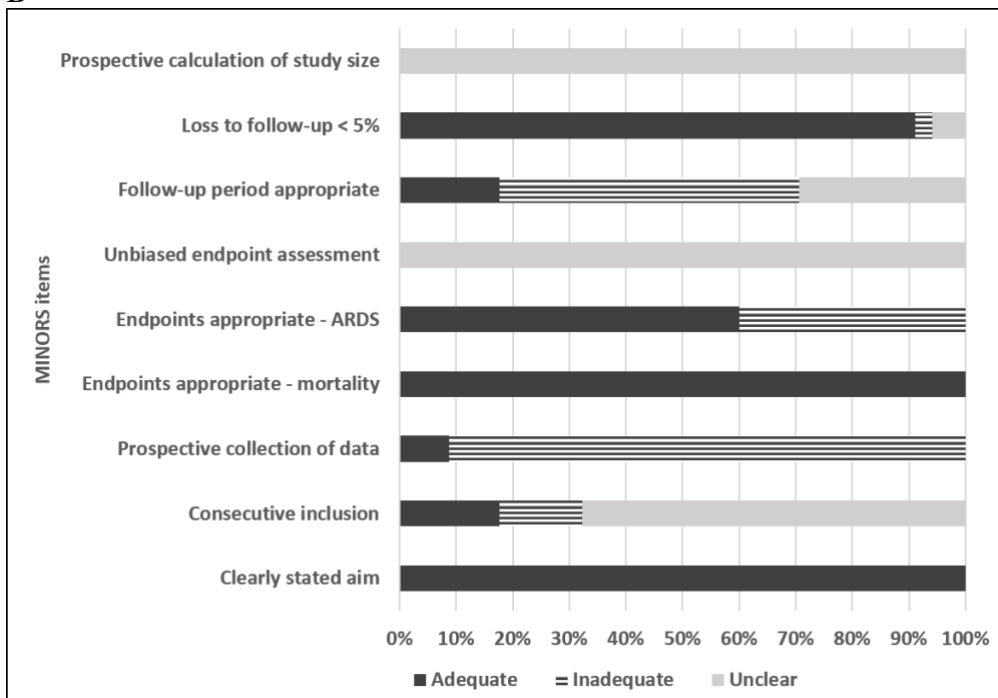

The item on unbiased endpoint assessment was deemed adequate for ARDS if an external independent adjudication committee was involved

ARDS, acute respiratory distress syndrome; MINORS, methodological index for non-randomized studies

**Figure S3.** All-cause mortality by subgroup of patients with COVID-19, peer-reviewed studies

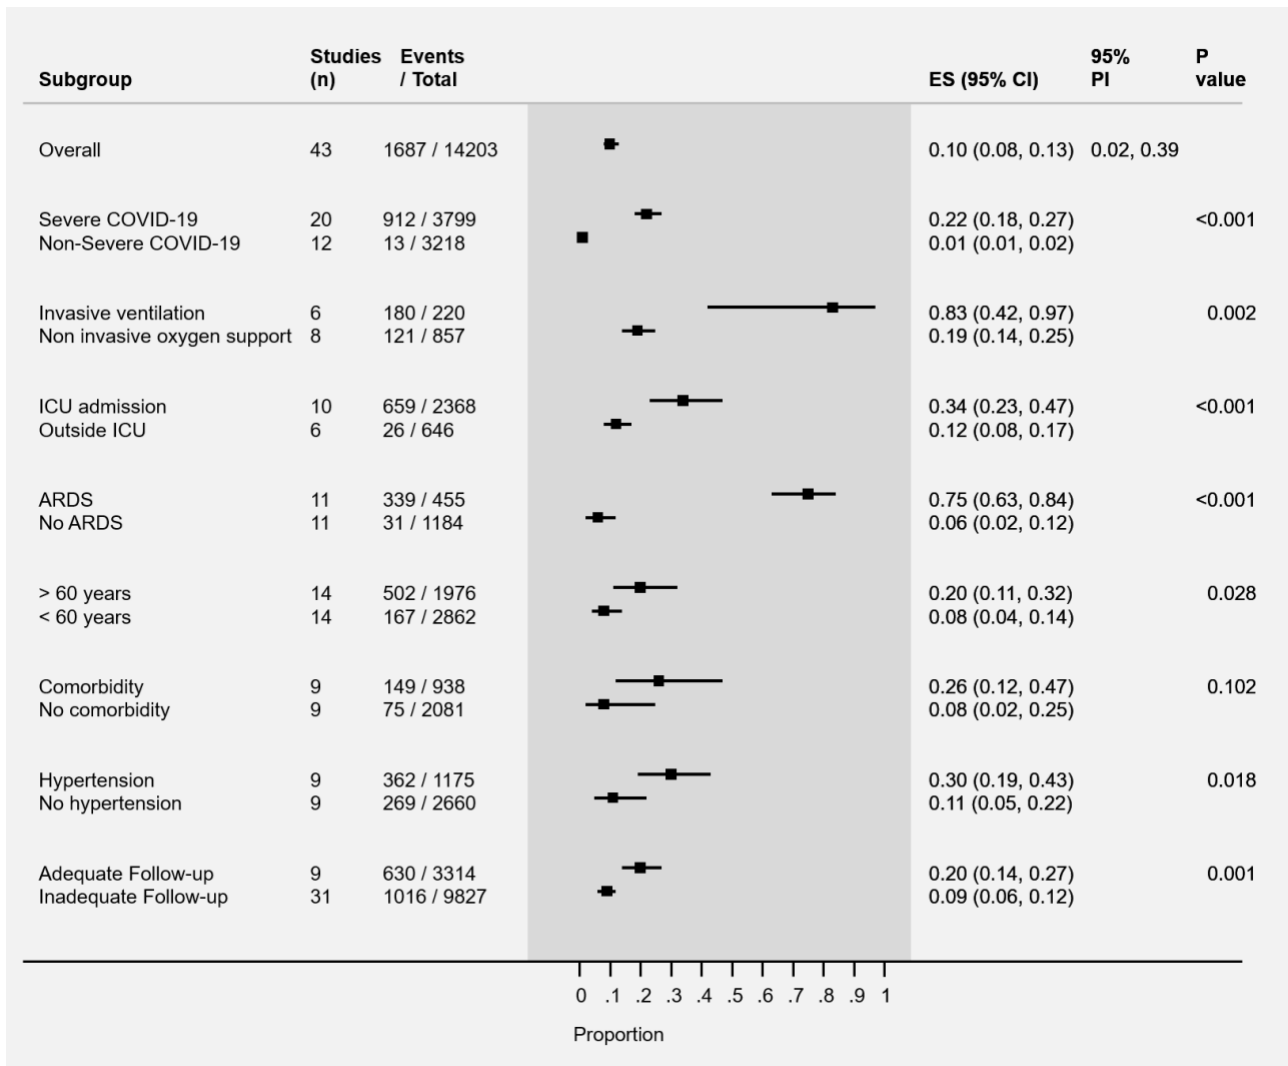

ARDS, acute respiratory distress syndrome; CI, confidence intervals; COVID-19, *Coronavirus* disease 2019; ES, estimates; ICU intensive care unit; PI, prediction intervals

**Figure S4.** ARDS by follow-up duration, peer-reviewed studies

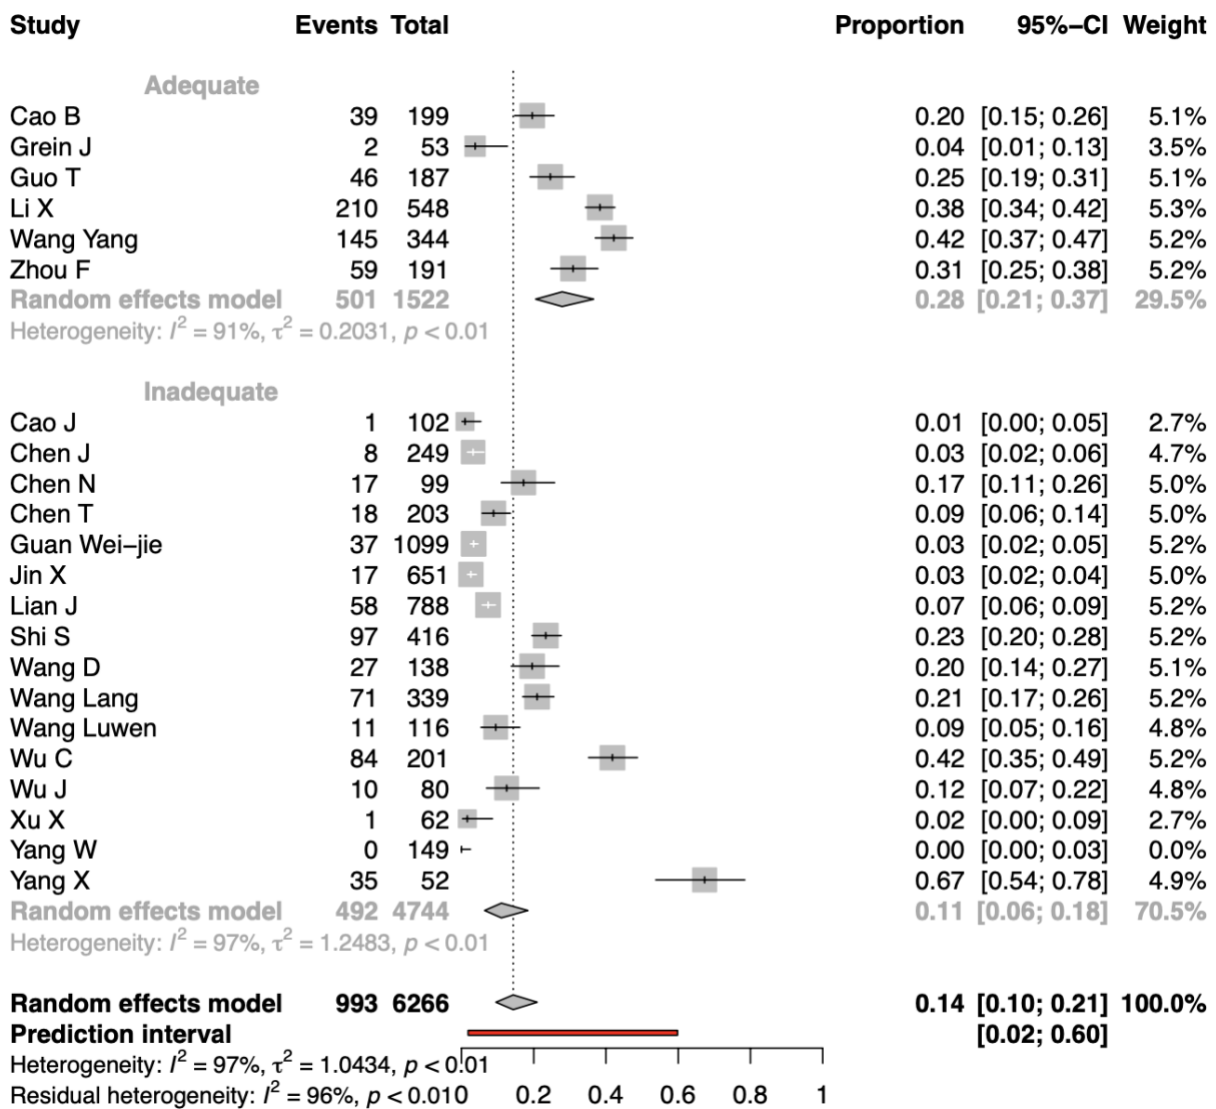

CI, confidence intervals



**Figure S5.** All-cause mortality in patients with COVID-19, not peer-reviewed studies

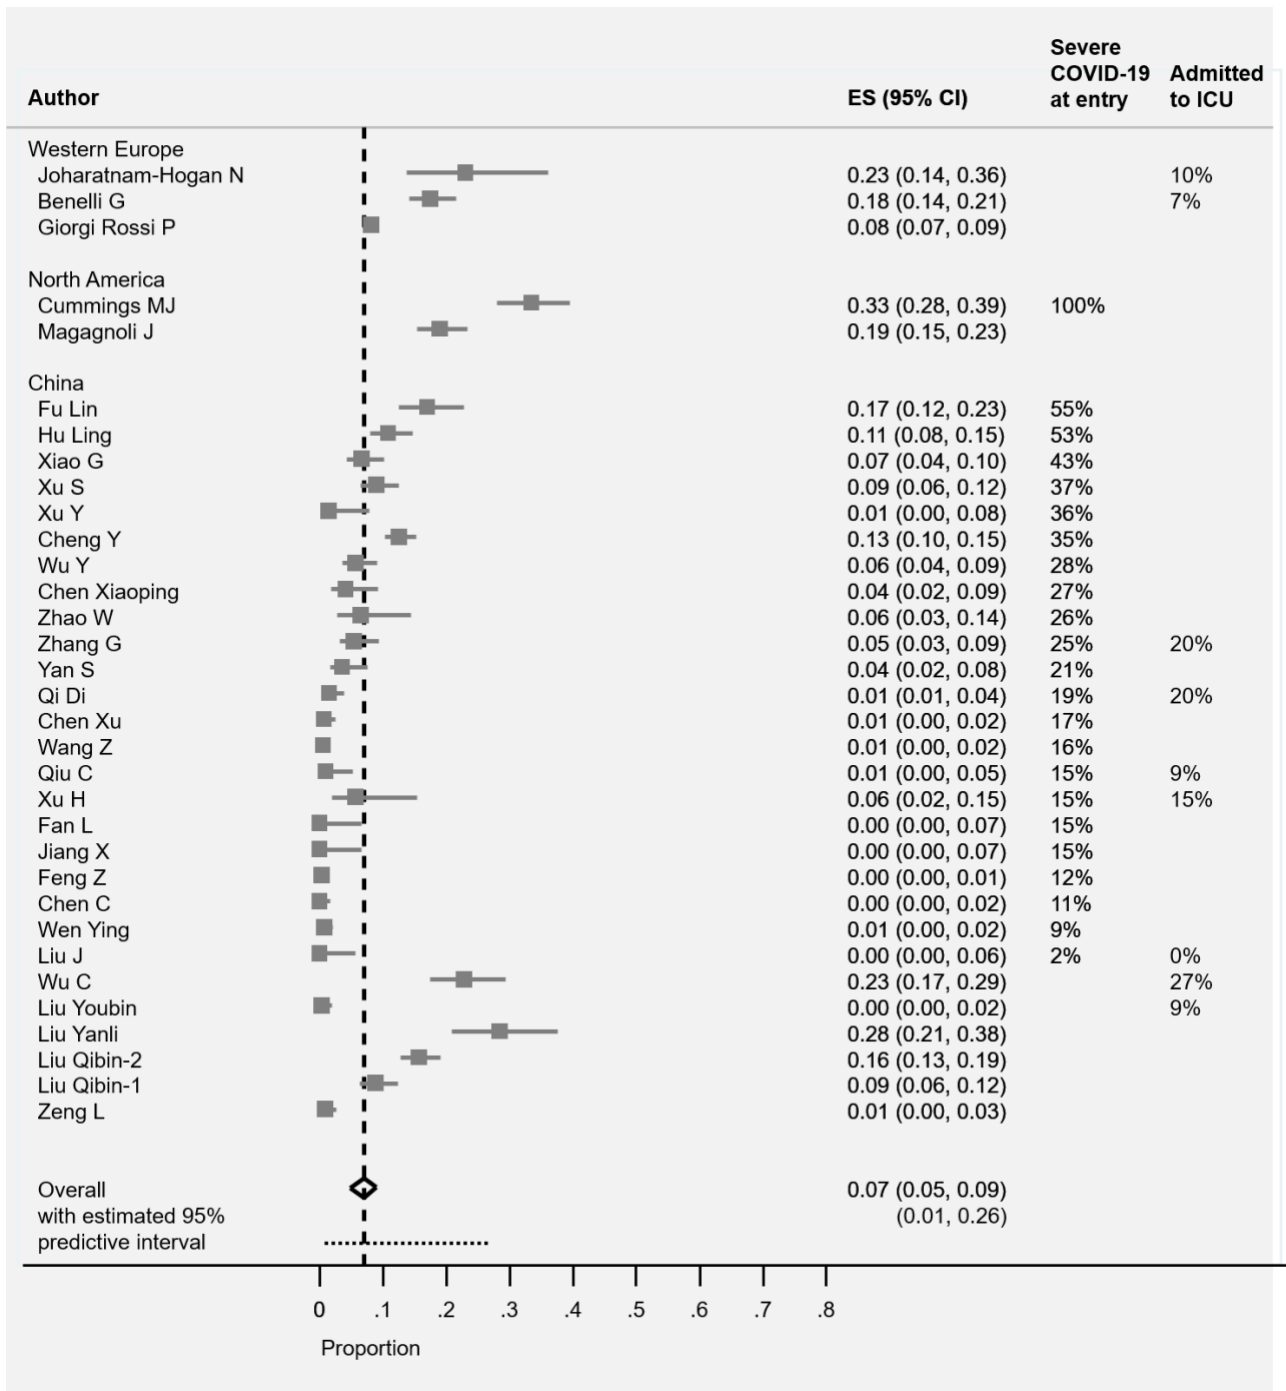

CI, confidence intervals; COVID-19, *Coronavirus* disease 2019; ES, estimates; ICU intensive care unit

**Figure S6.** ARDS in patients with COVID-19, not peer-reviewed studies

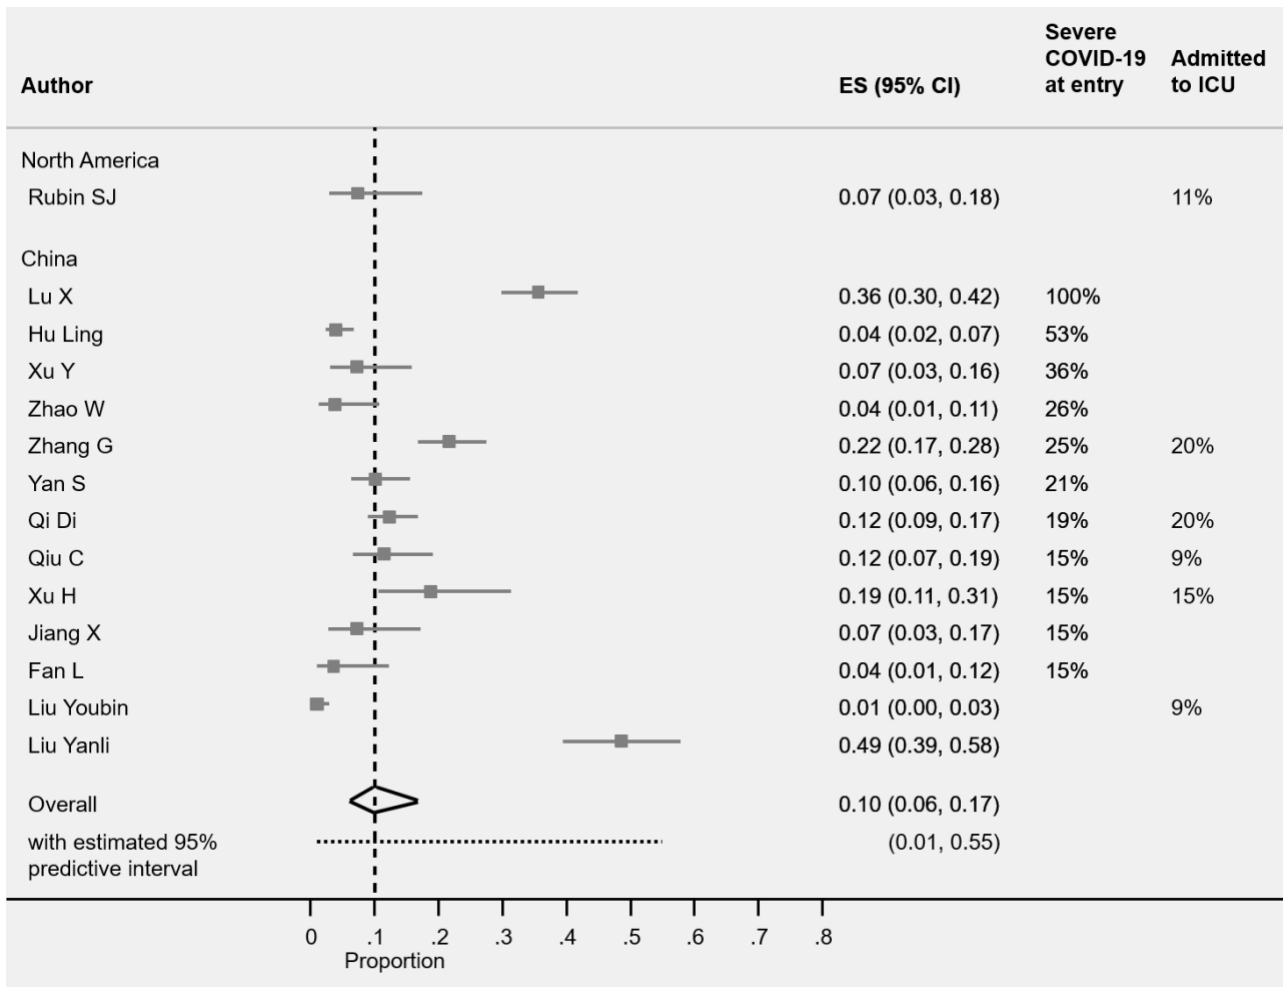

ARDS, acute respiratory distress syndrome; CI, confidence intervals; COVID-19, *Coronavirus* disease 2019; ES, estimates; ICU, intensive care unite

**Figure S7.** Acute cardiac injury in patients with COVID-19, not peer-reviewed studies

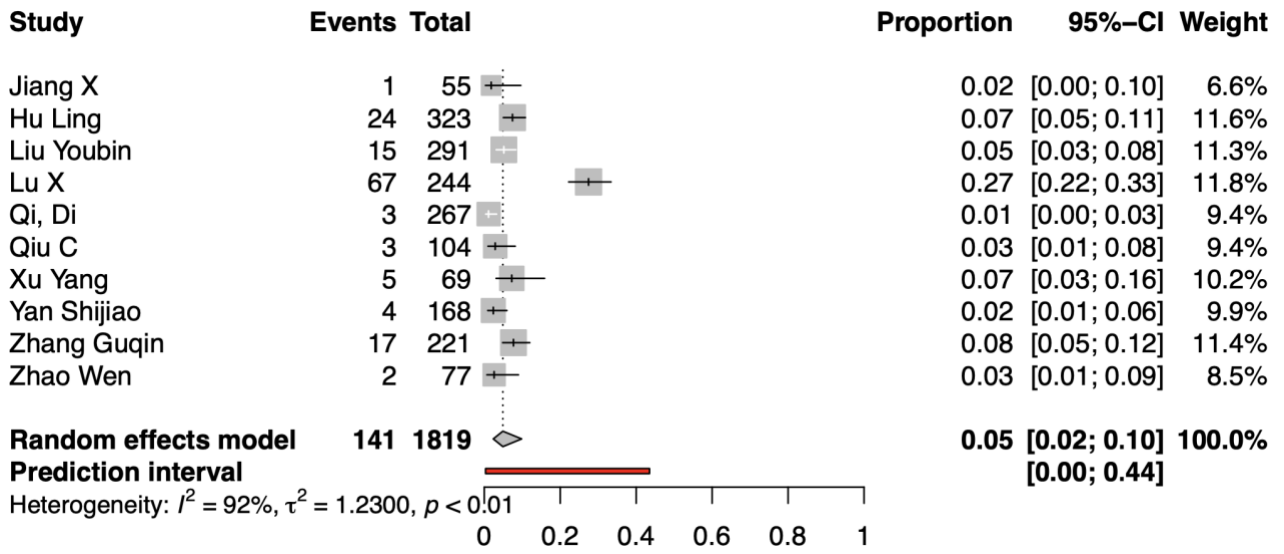

CI, confidence intervals; COVID-19, *Coronavirus* disease 2019

**Figure S8.** Acute kidney injury in patients with COVID-19, not peer-reviewed studies

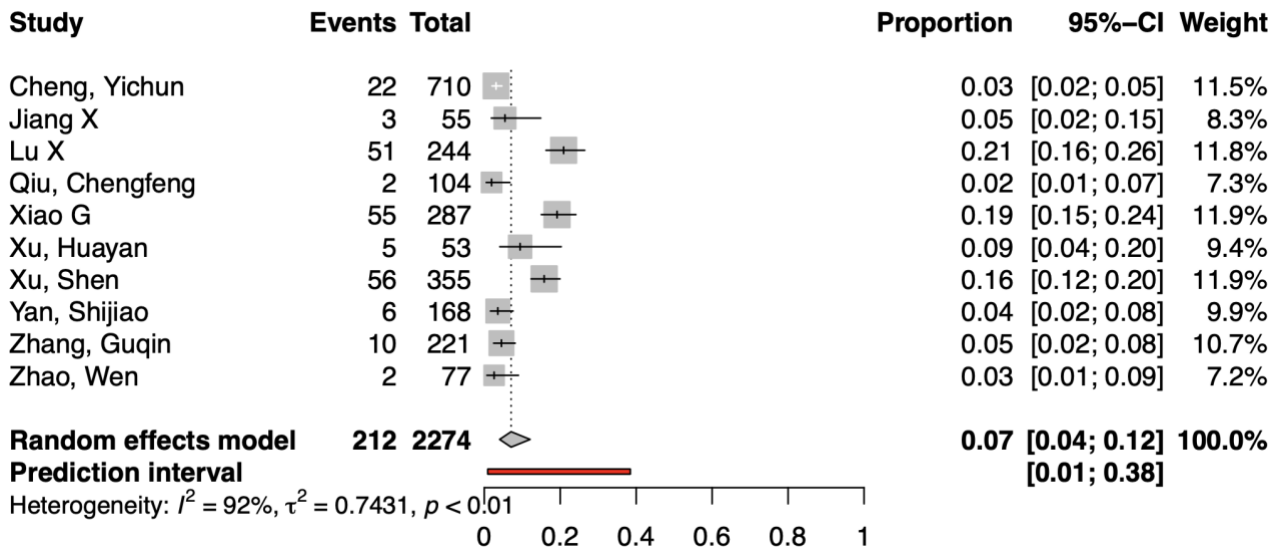

CI, confidence intervals; COVID-19, *Coronavirus* disease 2019

**Figure S9.** Coagulopathy in patients with COVID-19, not peer-reviewed studies

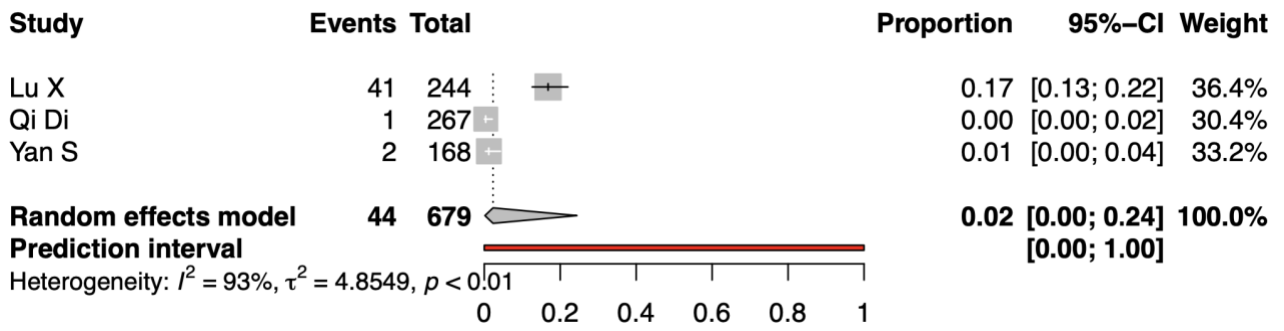

CI, confidence intervals; COVID-19, *Coronavirus* disease 2019

**Figure S10.** Shock in patients with COVID-19, not peer-reviewed studies

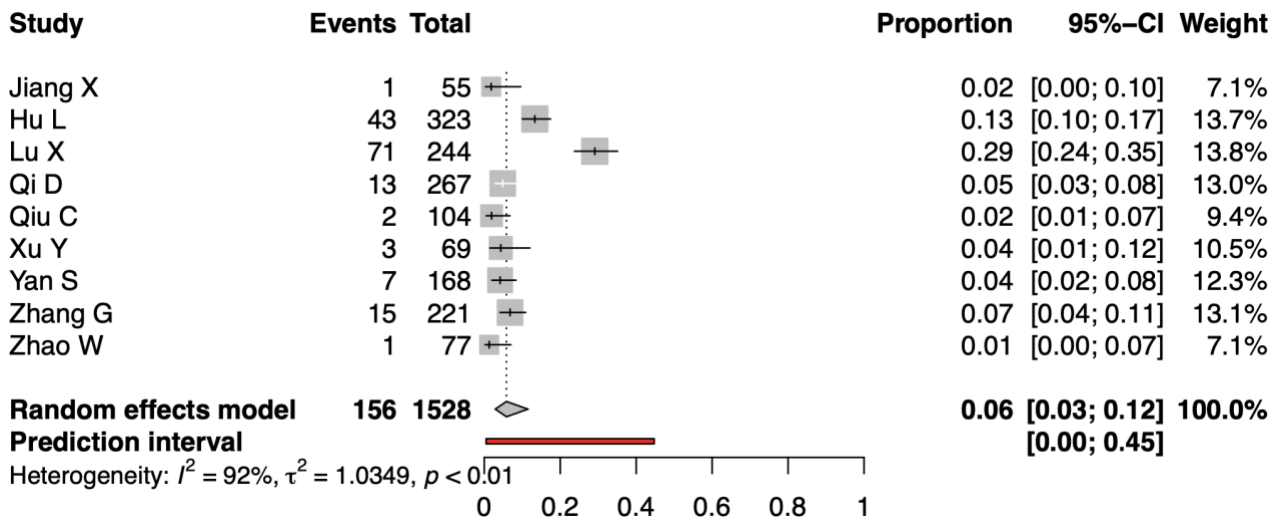

CI, confidence intervals; COVID-19, *Coronavirus* disease 2019

## References of peer-reviewed studies

1. Cao B, Wang Y, Wen D, Liu W, Wang J, Fan G, et al. A Trial of Lopinavir-Ritonavir in Adults Hospitalized with Severe Covid-19. *N Engl J Med*. 2020.
2. Cao J, Tu WJ, Cheng W, Yu L, Liu YK, Hu X, et al. Clinical Features and Short-term Outcomes of 102 Patients with Corona Virus Disease 2019 in Wuhan, China. *Clin Infect Dis*. 2020.
3. Chen J, Qi T, Liu L, Ling Y, Qian Z, Li T, et al. Clinical progression of patients with COVID-19 in Shanghai, China. *J Infect*. 2020.
4. Chen N, Zhou M, Dong X, Qu J, Gong F, Han Y, et al. Epidemiological and clinical characteristics of 99 cases of 2019 novel coronavirus pneumonia in Wuhan, China: a descriptive study. *Lancet*. 2020;395(10223):507-13.
5. Chen T, Dai Z, Mo P, Li X, Ma Z, Song S, et al. Clinical characteristics and outcomes of older patients with coronavirus disease 2019 (COVID-19) in Wuhan, China (2019): a single-centered, retrospective study. *J Gerontol A Biol Sci Med Sci*. 2020.
6. Cui S, Chen S, Li X, Liu S, Wang F. Prevalence of venous thromboembolism in patients with severe novel coronavirus pneumonia. *J Thromb Haemost*. 2020.
7. Fan Z, Chen L, Li J, Cheng X, Jingmao Y, Tian C, et al. Clinical Features of COVID-19-Related Liver Damage. *Clin Gastroenterol Hepatol*. 2020.
8. Feng Y, Ling Y, Bai T, Xie Y, Huang J, Li J, et al. COVID-19 with Different Severity: A Multi-center Study of Clinical Features. *Am J Respir Crit Care Med*. 2020.
9. Gao L, Jiang D, Wen XS, Cheng XC, Sun M, He B, et al. Prognostic value of NT-proBNP in patients with severe COVID-19. *Respir Res*. 2020;21(1):83.
10. Grasselli G, Zangrillo A, Zanella A, Antonelli M, Cabrini L, Castelli A, et al. Baseline Characteristics and Outcomes of 1591 Patients Infected With SARS-CoV-2 Admitted to ICUs of the Lombardy Region, Italy. *JAMA*. 2020.
11. Grein J, Ohmagari N, Shin D, Diaz G, Asperges E, Castagna A, et al. Compassionate Use of Remdesivir for Patients with Severe Covid-19. *N Engl J Med*. 2020.

12. Guan WJ, Liang WH, Zhao Y, Liang HR, Chen ZS, Li YM, et al. Comorbidity and its impact on 1590 patients with Covid-19 in China: A Nationwide Analysis. *Eur Respir J*. 2020.
13. Guan WJ, Ni ZY, Hu Y, Liang WH, Ou CQ, He JX, et al. Clinical Characteristics of Coronavirus Disease 2019 in China. *N Engl J Med*. 2020.
14. Guo T, Fan Y, Chen M, Wu X, Zhang L, He T, et al. Cardiovascular Implications of Fatal Outcomes of Patients With Coronavirus Disease 2019 (COVID-19). *JAMA Cardiol*. 2020.
15. Han H, Xie L, Liu R, Yang J, Liu F, Wu K, et al. Analysis of heart injury laboratory parameters in 273 COVID-19 patients in one hospital in Wuhan, China. *J Med Virol*. 2020.
16. Jin X, Lian JS, Hu JH, Gao J, Zheng L, Zhang YM, et al. Epidemiological, clinical and virological characteristics of 74 cases of coronavirus-infected disease 2019 (COVID-19) with gastrointestinal symptoms. *Gut*. 2020.
17. Klok FA, Kruip M, van der Meer NJM, Arbous MS, Gommers D, Kant KM, et al. Incidence of thrombotic complications in critically ill ICU patients with COVID-19. *Thromb Res*. 2020.
18. Li R, Tian J, Yang F, Lv L, Yu J, Sun G, et al. Clinical characteristics of 225 patients with COVID-19 in a tertiary Hospital near Wuhan, China. *J Clin Virol*. 2020;127:104363.
19. Li X, Xu S, Yu M, Wang K, Tao Y, Zhou Y, et al. Risk factors for severity and mortality in adult COVID-19 inpatients in Wuhan. *J Allergy Clin Immunol*. 2020.
20. Lian J, Jin X, Hao S, Cai H, Zhang S, Zheng L, et al. Analysis of Epidemiological and Clinical features in older patients with Corona Virus Disease 2019 (COVID-19) out of Wuhan. *Clin Infect Dis*. 2020.
21. Liu K, Chen Y, Lin R, Han K. Clinical features of COVID-19 in elderly patients: A comparison with young and middle-aged patients. *J Infect*. 2020.
22. Liu K, Fang YY, Deng Y, Liu W, Wang MF, Ma JP, et al. Clinical characteristics of novel coronavirus cases in tertiary hospitals in Hubei Province. *Chin Med J (Engl)*. 2020.



23. Liu W, Tao ZW, Lei W, Ming-Li Y, Kui L, Ling Z, et al. Analysis of factors associated with disease outcomes in hospitalized patients with 2019 novel coronavirus disease. *Chin Med J (Engl)*. 2020.
24. Qian GQ, Yang NB, Ding F, Ma AHY, Wang ZY, Shen YF, et al. Epidemiologic and Clinical Characteristics of 91 Hospitalized Patients with COVID-19 in Zhejiang, China: A retrospective, multi-centre case series. *QJM*. 2020.
25. Shi H, Han X, Jiang N, Cao Y, Alwalid O, Gu J, et al. Radiological findings from 81 patients with COVID-19 pneumonia in Wuhan, China: a descriptive study. *Lancet Infect Dis*. 2020;20(4):425-34.
26. Shi S, Qin M, Shen B, Cai Y, Liu T, Yang F, et al. Association of Cardiac Injury With Mortality in Hospitalized Patients With COVID-19 in Wuhan, China. *JAMA Cardiol*. 2020.
27. Tang N, Bai H, Chen X, Gong J, Li D, Sun Z. Anticoagulant treatment is associated with decreased mortality in severe coronavirus disease 2019 patients with coagulopathy. *J Thromb Haemost*. 2020;18(5):1094-9.
28. Tang N, Li D, Wang X, Sun Z. Abnormal coagulation parameters are associated with poor prognosis in patients with novel coronavirus pneumonia. *J Thromb Haemost*. 2020;18(4):844-7.
29. Tian S, Hu N, Lou J, Chen K, Kang X, Xiang Z, et al. Characteristics of COVID-19 infection in Beijing. *J Infect*. 2020;80(4):401-6.
30. Wang D, Hu B, Hu C, Zhu F, Liu X, Zhang J, et al. Clinical Characteristics of 138 Hospitalized Patients With 2019 Novel Coronavirus-Infected Pneumonia in Wuhan, China. *JAMA*. 2020.
31. Wang L, He W, Yu X, Hu D, Bao M, Liu H, et al. Coronavirus disease 2019 in elderly patients: Characteristics and prognostic factors based on 4-week follow-up. *J Infect*. 2020.
32. Wang L, Li X, Chen H, Yan S, Li D, Li Y, et al. Coronavirus Disease 19 Infection Does Not Result in Acute Kidney Injury: An Analysis of 116 Hospitalized Patients from Wuhan, China. *Am J Nephrol*. 2020:1-6.

33. Wang Y, Lu X, Chen H, Chen T, Su N, Huang F, et al. Clinical Course and Outcomes of 344 Intensive Care Patients with COVID-19. *Am J Respir Crit Care Med*. 2020.
34. Wang Y, Dong C, Hu Y, Li C, Ren Q, Zhang X, et al. Temporal Changes of CT Findings in 90 Patients with COVID-19 Pneumonia: A Longitudinal Study. *Radiology*. 2020:200843.
35. Wang Z, Yang B, Li Q, Wen L, Zhang R. Clinical Features of 69 Cases with Coronavirus Disease 2019 in Wuhan, China. *Clin Infect Dis*. 2020.
36. Wu C, Chen X, Cai Y, Xia J, Zhou X, Xu S, et al. Risk Factors Associated With Acute Respiratory Distress Syndrome and Death in Patients With Coronavirus Disease 2019 Pneumonia in Wuhan, China. *JAMA Intern Med*. 2020.
37. Wu J, Liu J, Zhao X, Liu C, Wang W, Wang D, et al. Clinical Characteristics of Imported Cases of COVID-19 in Jiangsu Province: A Multicenter Descriptive Study. *Clin Infect Dis*. 2020.
38. Xu XW, Wu XX, Jiang XG, Xu KJ, Ying LJ, Ma CL, et al. Clinical findings in a group of patients infected with the 2019 novel coronavirus (SARS-Cov-2) outside of Wuhan, China: retrospective case series. *BMJ*. 2020;368:m606.
39. Yang W, Cao Q, Qin L, Wang X, Cheng Z, Pan A, et al. Clinical characteristics and imaging manifestations of the 2019 novel coronavirus disease (COVID-19):A multi-center study in Wenzhou city, Zhejiang, China. *J Infect*. 2020;80(4):388-93.
40. Yang X, Yu Y, Xu J, Shu H, Xia J, Liu H, et al. Clinical course and outcomes of critically ill patients with SARS-CoV-2 pneumonia in Wuhan, China: a single-centered, retrospective, observational study. *Lancet Respir Med*. 2020.
41. Yang X, Yang Q, Wang Y, Wu Y, Xu J, Yu Y, et al. Thrombocytopenia and Its Association with Mortality in Patients with COVID-19. *J Thromb Haemost*. 2020.
42. Zhang J, Wang X, Jia X, Li J, Hu K, Chen G, et al. Risk factors for disease severity, unimprovement, and mortality in COVID-19 patients in Wuhan, China. *Clin Microbiol Infect*. 2020.

43. Zhang L, Yan X, Fan Q, Liu H, Liu X, Liu Z, et al. D-dimer levels on admission to predict in-hospital mortality in patients with Covid-19. *J Thromb Haemost.* 2020.
44. Zhou F, Yu T, Du R, Fan G, Liu Y, Liu Z, et al. Clinical course and risk factors for mortality of adult inpatients with COVID-19 in Wuhan, China: a retrospective cohort study. *Lancet.* 2020;395(10229):1054-62.

### **References of not peer-reviewed studies**

45. Benelli G, Buscarini E, Canetta C, La Piana G, Merli GJ, Scartabellati A, et al. SARS-COV2 comorbidity network and outcome in hospitalized patients in Crema, Italy. doi: 10.1101/2020.04.14.20053090.
46. Chen C, Huang J, Cheng Z, Wu J, Chen S, Zhang Y, et al. Favipiravir versus Arbidol for COVID-19: A Randomized Clinical Trial. doi: 10.1101/2020.03.17.20037432.
47. Chen X, Jiang Q, Ma Z, Ling J, Hu W, Cao Q, et al. Clinical Characteristics Hospitalized Patients with SARS-Cov-2 and HBV Co- infection. doi: 10.1101/2020.03.23.20040733.
48. Chen X, Zheng F, Qing Y, Ding S, Yang D, Lei C, et al. Epidemiological and clinical features of 291 cases with coronavirus disease 2019 in areas adjacent to Hubei, China: a double-center observational study. doi: 10.1101/2020.03.03.20030353.
49. Cheng Y, Luo R, Wang K, Zhang W, Wang Z, Dong L, et al. Kidney impairment is associated with in-hospital death of COVID-19 patients. doi: 10.1101/2020.02.18.20023242.
50. Cummings M, Baldwin M, Abrams D, Jacobson S, Meyer B, Balough E, et al. Epidemiology, clinical course, and outcomes of critically ill adults with COVID-19 in New York City: a prospective cohort study. doi: 10.1101/2020.04.15.20067157.
51. Fan L, Liu H, Li N, Liu C, Gu Y, Liu Y, et al. Medical treatment of 55 patients with COVID-19 from seven cities in northeast China who fully recovered: a single-center, retrospective, observational study. doi: 10.1101/2020.03.28.20045955.

52. Feng Z, Li J, Yao S, Yu Q, Zhou W, Mao X, et al. The Use of Adjuvant Therapy in Preventing Progression to Severe Pneumonia in Patients with Coronavirus Disease 2019: A Multicenter Data Analysis. doi: 10.1101/2020.04.08.20057539.
53. Fu L, Fei J, Xu S, Xiang H, Xiang Y, Tan Z, et al. Acute liver injury and its association with death risk of patients with COVID-19: a hospital-based prospective case-cohort study. doi: 10.1101/2020.04.02.20050997.
54. Giorgi Rossi P, Marino M, Formisano D, Venturelli F, Vicentini M, Grilli R, et al. Title: Characteristics and outcomes of a cohort of SARS-CoV-2 patients in the Province of Reggio Emilia, Italy. doi: 10.1101/2020.04.13.20063545.
55. Hu L, Chen S, Fu Y, Gao Z, Long H, Ren H, et al. Risk Factors Associated with Clinical Outcomes in 323 COVID-19 Patients in Wuhan, China. doi: 10.1101/2020.03.25.20037721.
56. Jiang X, Tao J, Wu H, Wang Y, Zhao W, Zhou M, et al. Clinical features and management of severe COVID-19: A retrospective study in Wuxi, Jiangsu Province, China. doi: 10.1101/2020.04.10.20060335.
57. Joharatnam-Hogan N, Hochhauser D, Shiu K, Rush H, Crolley V, Butcher E, et al. Outcomes of the 2019 Novel Coronavirus in patients with or without a history of cancer - a multi-centre North London experience. doi: 10.1101/2020.04.16.20061127.
58. Liu J, Ouyang L, Guo P, Wu H, Fu P, Chen Y, et al. Epidemiological, Clinical Characteristics and Outcome of Medical Staff Infected with COVID-19 in Wuhan, China: A Retrospective Case Series Analysis. doi: 10.1101/2020.03.09.20033118.
59. Liu Q, Fang X, Tian L, Chung U, Chen X, Wang K, et al. The effect of Arbidol Hydrochloride on reducing mortality of Covid-19 patients: a retrospective study of real-world data from three hospitals in Wuhan. doi: 10.1101/2020.04.11.20056523.
60. Liu Q, Fang X, Tokuno S, Chung U, Chen X, Dai X, et al. Prediction of the clinical outcome of COVID-19 patients using T lymphocyte subsets with 340 cases from Wuhan, China: a retrospective cohort study and a web visualization tool. doi: 10.1101/2020.04.06.20056127.

61. Liu Y, Sun W, Li J, Chen L, Wang Y, Zhang L, et al. Clinical features and progression of acute respiratory distress syndrome in coronavirus disease 2019. doi: 10.1101/2020.02.17.20024166.
62. Liu Y, Li J, Liu D, Song H, Chen C, Iv M, et al. Clinical features and outcomes of 2019 novel coronavirus-infected patients with cardiac injury. doi: 10.1101/2020.03.11.20030957.
63. Lu X, Chen T, Wang Y, Wang J, Zhang B, Li Y, et al. Adjuvant corticosteroid therapy for critically ill patients with COVID-19. doi: 10.1101/2020.04.07.20056390.
64. Magagnoli J, Narendran S, Pereira F, Cummings T, Hardin J, Sutton S, et al. Outcomes of hydroxychloroquine usage in United States veterans hospitalized with Covid-19. doi: 10.1101/2020.04.16.20065920.
65. Qi D, Yan X, Tang X, Peng J, Yu Q, Feng L, et al. Epidemiological and clinical features of 2019-nCoV acute respiratory disease cases in Chongqing municipality, China: a retrospective, descriptive, multiple-center study. doi: 10.1101/2020.03.01.20029397.
66. Qiu C, Xiao Q, Liao X, Deng Z, Liu H, Shu Y, et al. Transmission and clinical characteristics of coronavirus disease 2019 in 104 outside-Wuhan patients, China. doi: 10.1101/2020.03.04.20026005.
67. Rubin J, Falkson S, Degner N, Blish C. Clinical characteristics associated with COVID-19 severity in California. doi: 10.1101/2020.03.27.20043661.
68. Wang Z, Ji J, Liu Y, Liu R, Zha Y, Chang X, et al. Survival analysis of hospital length of stay of novel coronavirus (COVID-19) pneumonia patients in Sichuan, China. doi: 10.1101/2020.04.07.20057299.
69. Wen Y, Wei L, Li Y, Tang X, Feng S, Leung K, et al. Epidemiological and clinical characteristics of COVID-19 in Shenzhen, the largest migrant city of China. doi: 10.1101/2020.03.22.20035246.

70. Wu C, Hu X, Song J, Du C, Xu J, Yang D, et al. Heart injury signs are associated with higher and earlier mortality in coronavirus disease 2019 (COVID-19). doi: 10.1101/2020.02.26.20028589.
71. Wu Y, Guo W, Liu H, Qi B, Liang K, Xu B, et al. Clinical outcomes of 402 patients with COVID-2019 from a single center in Wuhan, China. doi: 10.1101/2020.03.07.20032672.
72. Xiao G, Hu H, Wu F, Sha T, Huang Q, Li H, et al. Acute kidney injury in patients hospitalized with COVID-19 in Wuhan, China: A single-center retrospective observational study. doi: 10.1101/2020.04.06.20055194.
73. Xu H, Hou K, Xu H, Li Z, Chen H, Zhang N, et al. Acute Myocardial Injury of Patients with Coronavirus Disease 2019. doi: 10.1101/2020.03.05.20031591.
74. Xu S, Fu L, Fei J, Xiang H, Xiang Y, Tan Z, et al. Acute kidney injury at early stage as a negative prognostic indicator of patients with COVID-19: a hospital-based retrospective analysis. doi: 10.1101/2020.03.24.20042408.
75. Xu Y, Li Y, Zeng Q, Lu Z, Li Y, Wu W, et al. Clinical Characteristics of SARS-CoV-2 Pneumonia Compared to Controls in Chinese Han Population. doi: 10.1101/2020.03.08.20031658.
76. Yan S, Song X, Lin F, Zhu H, Wang X, Li M, et al. Clinical Characteristics of Coronavirus Disease 2019 in Hainan, China. doi: 10.1101/2020.03.19.20038539.
77. Zeng L, Li J, Liao M, Hua R, Huang P, Zhang M, et al. Risk assessment of progression to severe conditions for patients with COVID-19 pneumonia: a single-center retrospective study. doi: 10.1101/2020.03.25.20043166.
78. Zhang G, Hu C, Luo H, Fang F, Chen Y, Li J, et al. Clinical features and outcomes of 221 patients with COVID-19 in Wuhan, China. doi: 10.1101/2020.03.02.20030452.
79. Zhao W, Yu S, Zha X, Wang N, Pang Q, Li T, et al. Clinical characteristics and durations of hospitalized patients with COVID-19 in Beijing: a retrospective cohort study. doi: 10.1101/2020.03.13.20035436.

## PRISMA 2009 checklist

| Section/topic                      | #  | Checklist item                                                                                                                                                                                                                                                                                              | Reported on page #     |
|------------------------------------|----|-------------------------------------------------------------------------------------------------------------------------------------------------------------------------------------------------------------------------------------------------------------------------------------------------------------|------------------------|
| <b>TITLE</b>                       |    |                                                                                                                                                                                                                                                                                                             |                        |
| Title                              | 1  | Identify the report as a systematic review, meta-analysis, or both.                                                                                                                                                                                                                                         | 1                      |
| <b>ABSTRACT</b>                    |    |                                                                                                                                                                                                                                                                                                             |                        |
| Structured summary                 | 2  | Provide a structured summary including, as applicable: background; objectives; data sources; study eligibility criteria, participants, and interventions; study appraisal and synthesis methods; results; limitations; conclusions and implications of key findings; systematic review registration number. | 2-3                    |
| <b>INTRODUCTION</b>                |    |                                                                                                                                                                                                                                                                                                             |                        |
| Rationale                          | 3  | Describe the rationale for the review in the context of what is already known.                                                                                                                                                                                                                              | 4                      |
| Objectives                         | 4  | Provide an explicit statement of questions being addressed with reference to participants, interventions, comparisons, outcomes, and study design (PICOS).                                                                                                                                                  | 4                      |
| <b>METHODS</b>                     |    |                                                                                                                                                                                                                                                                                                             |                        |
| Protocol and registration          | 5  | Indicate if a review protocol exists, if and where it can be accessed (e.g., Web address), and, if available, provide registration information including registration number.                                                                                                                               | 4                      |
| Eligibility criteria               | 6  | Specify study characteristics (e.g., PICOS, length of follow-up) and report characteristics (e.g., years considered, language, publication status) used as criteria for eligibility, giving rationale.                                                                                                      | 5                      |
| Information sources                | 7  | Describe all information sources (e.g., databases with dates of coverage, contact with study authors to identify additional studies) in the search and date last searched.                                                                                                                                  | 4-5, Additional file 1 |
| Search                             | 8  | Present full electronic search strategy for at least one database, including any limits used, such that it could be repeated.                                                                                                                                                                               | Additional file 1      |
| Study selection                    | 9  | State the process for selecting studies (i.e., screening, eligibility, included in systematic review, and, if applicable, included in the meta-analysis).                                                                                                                                                   | 5                      |
| Data collection process            | 10 | Describe method of data extraction from reports (e.g., piloted forms, independently, in duplicate) and any processes for obtaining and confirming data from investigators.                                                                                                                                  | 5                      |
| Data items                         | 11 | List and define all variables for which data were sought (e.g., PICOS, funding sources) and any assumptions and simplifications made.                                                                                                                                                                       | 5-6                    |
| Risk of bias in individual studies | 12 | Describe methods used for assessing risk of bias of individual studies (including specification of whether this was done at the study or outcome level), and how this information is to be used in any data synthesis.                                                                                      | 6                      |
| Summary measures                   | 13 | State the principal summary measures (e.g., risk ratio, difference in means).                                                                                                                                                                                                                               | 7                      |
| Synthesis of results               | 14 | Describe the methods of handling data and combining results of studies, if done, including measures of consistency (e.g., I <sup>2</sup> ) for each meta-analysis.                                                                                                                                          | 7-8                    |

| Section/topic                 | #  | Checklist item                                                                                                                                                                                           | Reported on page #     |
|-------------------------------|----|----------------------------------------------------------------------------------------------------------------------------------------------------------------------------------------------------------|------------------------|
| Risk of bias across studies   | 15 | Specify any assessment of risk of bias that may affect the cumulative evidence (e.g., publication bias, selective reporting within studies).                                                             | -                      |
| Additional analyses           | 16 | Describe methods of additional analyses (e.g., sensitivity or subgroup analyses, meta-regression), if done, indicating which were pre-specified.                                                         | 7-8                    |
| <b>RESULTS</b>                |    |                                                                                                                                                                                                          |                        |
| Study selection               | 17 | Give numbers of studies screened, assessed for eligibility, and included in the review, with reasons for exclusions at each stage, ideally with a flow diagram.                                          | 8                      |
| Study characteristics         | 18 | For each study, present characteristics for which data were extracted (e.g., study size, PICOS, follow-up period) and provide the citations.                                                             | 8-9, Additional file 1 |
| Risk of bias within studies   | 19 | Present data on risk of bias of each study and, if available, any outcome level assessment (see item 12).                                                                                                | 9, Additional file 1   |
| Results of individual studies | 20 | For all outcomes considered (benefits or harms), present, for each study: (a) simple summary data for each intervention group (b) effect estimates and confidence intervals, ideally with a forest plot. | 10-11                  |
| Synthesis of results          | 21 | Present results of each meta-analysis done, including confidence intervals and measures of consistency.                                                                                                  | 10-11                  |
| Risk of bias across studies   | 22 | Present results of any assessment of risk of bias across studies (see Item 15).                                                                                                                          | -                      |
| Additional analysis           | 23 | Give results of additional analyses, if done (e.g., sensitivity or subgroup analyses, meta-regression [see Item 16]).                                                                                    | 11, Additional file 1  |
| <b>DISCUSSION</b>             |    |                                                                                                                                                                                                          |                        |
| Summary of evidence           | 24 | Summarize the main findings including the strength of evidence for each main outcome; consider their relevance to key groups (e.g., healthcare providers, users, and policy makers).                     | 12-13                  |
| Limitations                   | 25 | Discuss limitations at study and outcome level (e.g., risk of bias), and at review-level (e.g., incomplete retrieval of identified research, reporting bias).                                            | 13                     |
| Conclusions                   | 26 | Provide a general interpretation of the results in the context of other evidence, and implications for future research.                                                                                  | 14                     |
| <b>FUNDING</b>                |    |                                                                                                                                                                                                          |                        |
| Funding                       | 27 | Describe sources of funding for the systematic review and other support (e.g., supply of data); role of funders for the systematic review.                                                               | 15                     |
